# Supplementary material for: Early Stopping in Experimentation with Real-time Functional Magnetic Resonance Imaging Using a Modified Sequential Probability Ratio Test
Source: bioRxiv or medRxiv preprint supplement (doi:10.1101/2021.01.15.21249886), 2021-05-19
Supplement: Supplementary file [file media-1.pdf]

**Table S1:** Statistical maps of activation for easy and hard levels for the one back task. Maps shown are for those instances where early stopping occurred and there is < 50% overlap between the active voxels of the early stopped scans and the full duration scan, See Table 2C and D in main document. 70% and 80% of voxels classified active and non-active are shown side by side for comparison. Full duration active voxels are shown in blue for all time points for easy reference. 2-block first stage result is overlaid in red, 4-block first stage result is in green. Slice number is given in MNI space. Grey matter is highlighted in yellow.

| Sub            | Level | Slice | 2-Blocks (red)<br>Z<br>70% | 2-Blocks (red)<br>80% | 4-Blocks (green)<br>70% | 4-Blocks (green)<br>80% | Full duration (blue) |
|----------------|-------|-------|----------------------------|-----------------------|-------------------------|-------------------------|----------------------|
| <b>Control</b> |       |       |                            |                       |                         |                         |                      |
| 3              | Easy  | 52    | Scan 89<br>                | Scan 104<br>          | Scan 155<br>            | Scan 171<br>            |                      |
|                | Hard  | 52    | Same as 80%                | Scan 79<br>           | Scan 155<br>            | Scan 200<br>            |                      |
| 4              | Hard  | 51    | Scan 79<br>                | Scan 89<br>           | Scan 155<br>            | No early stopping<br>   |                      |

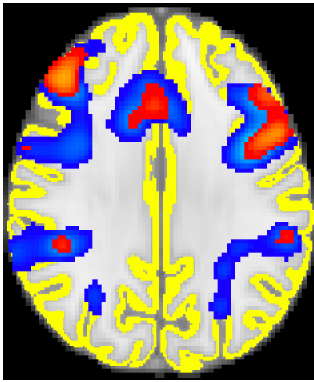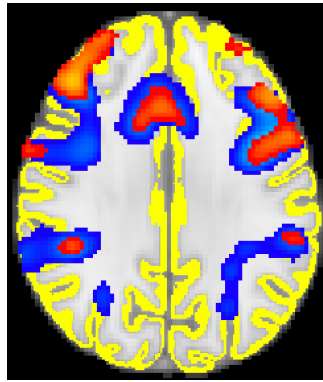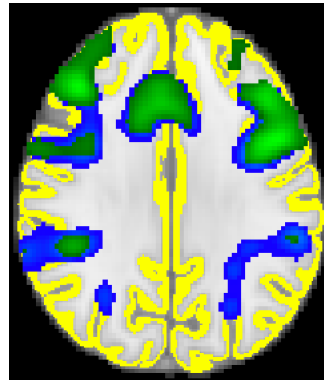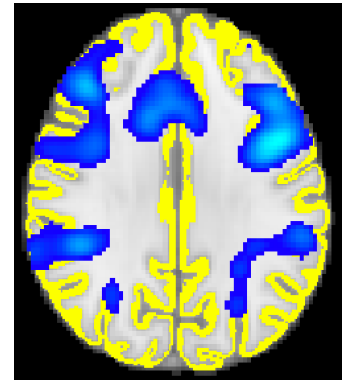

5 Hard 56 Same as 80%

Scan 79

Scan 155

No early stopping

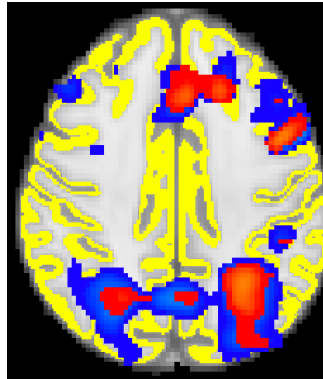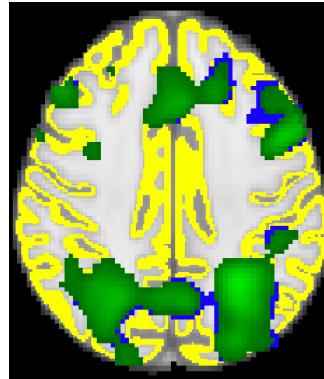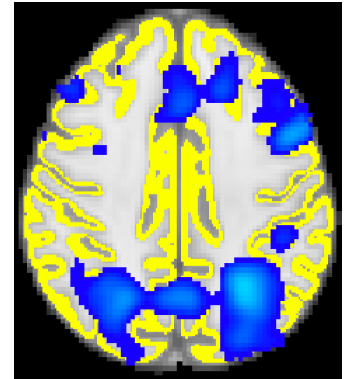

6 Easy 53 Same as 80%

Scan 79

Scan 155

Scan 180

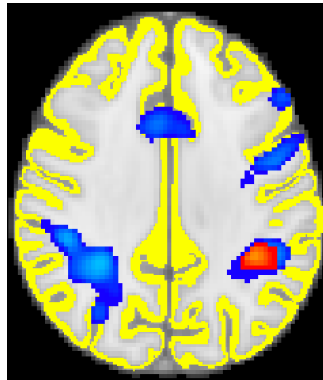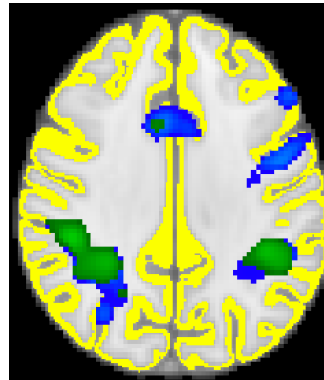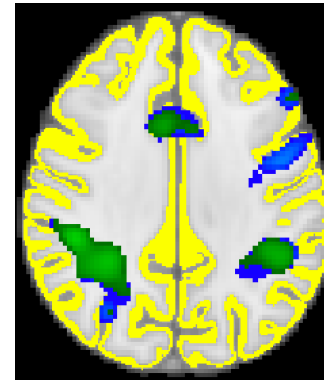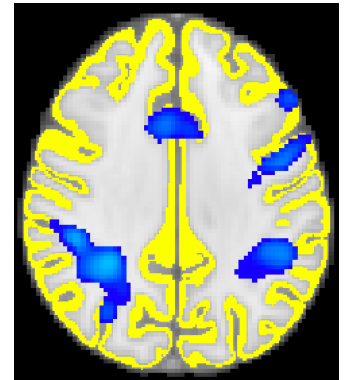

7 Easy 54 Scan 79

Scan 112

Scan 155

Scan 164

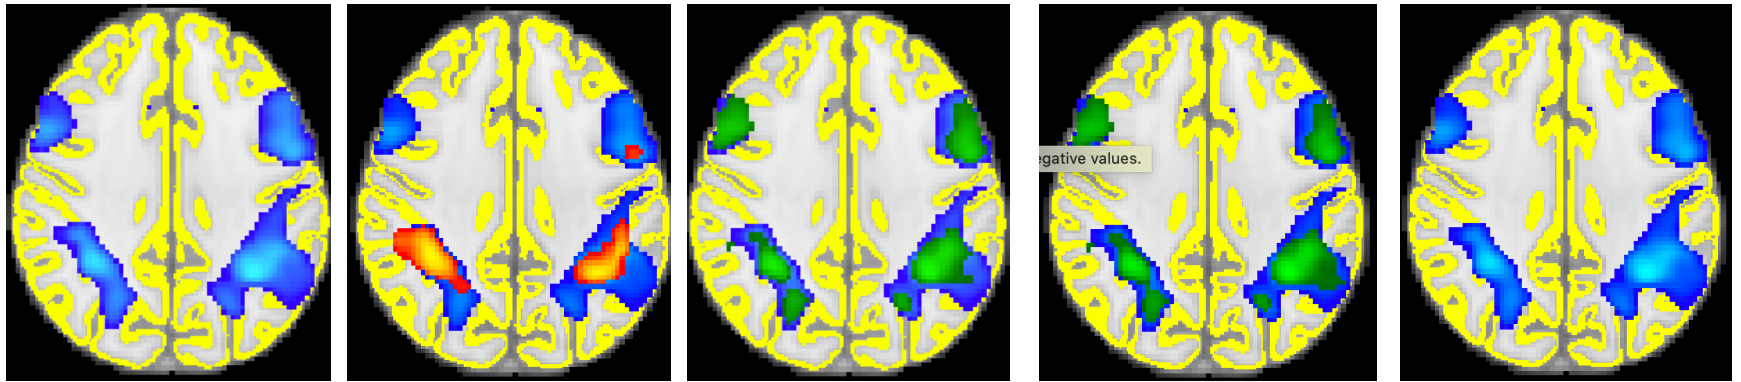

Hard 54

Scan 80

Scan 95

Same as 80%

Scan 155

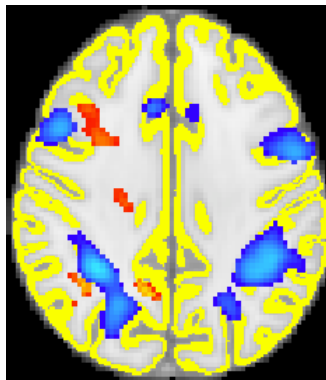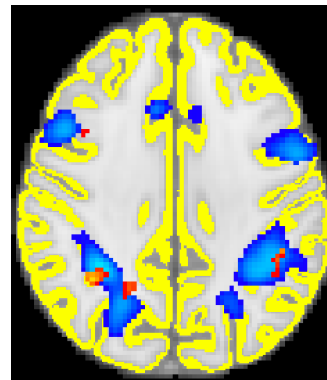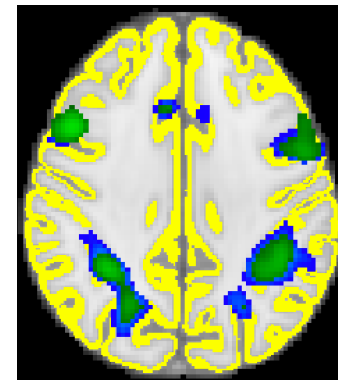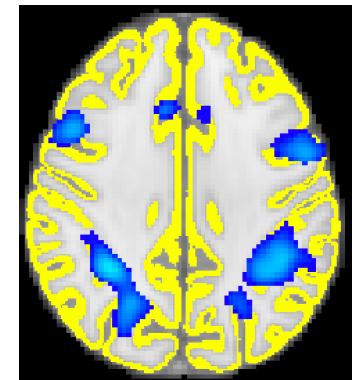

9 Easy 55

Same as 80%

Scan 79

Same as 80%

Scan 155

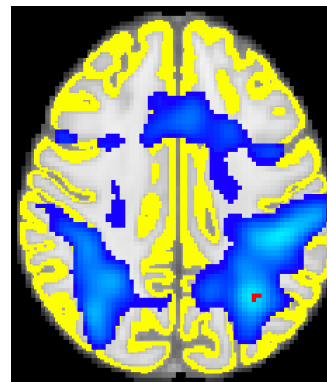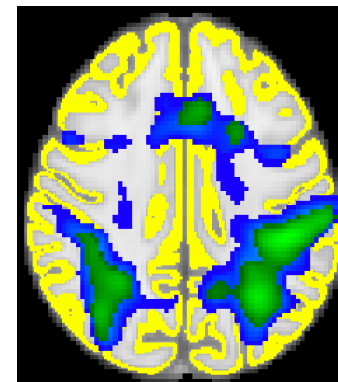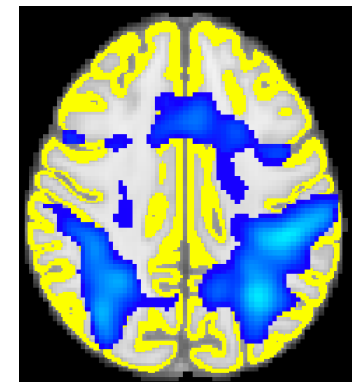

Hard 58

Scan 79

Scan 86

Same as 80%

Scan 155

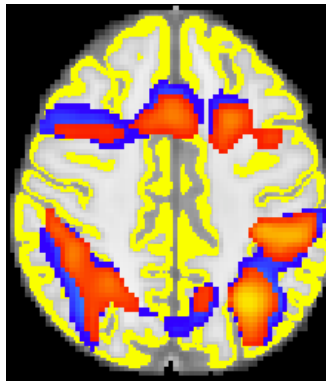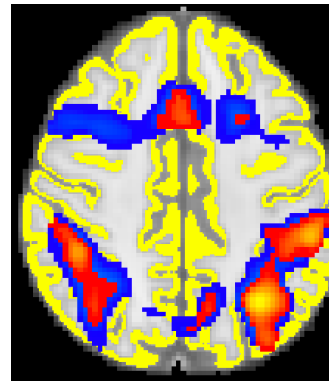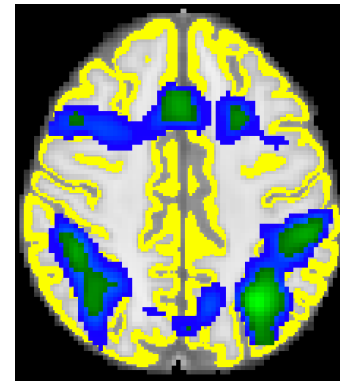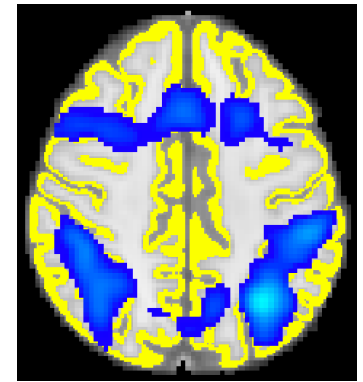

10 Hard 52

Scan 79

Scan 98

Same as 80%

Scan 155

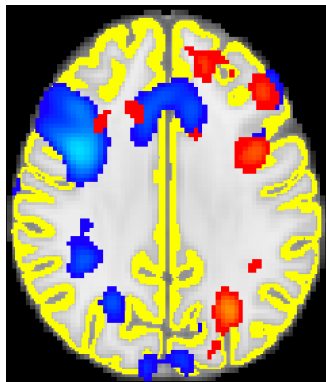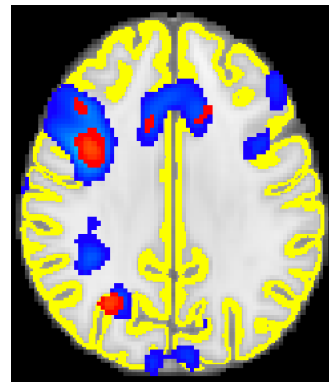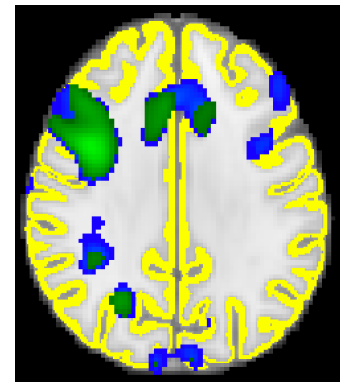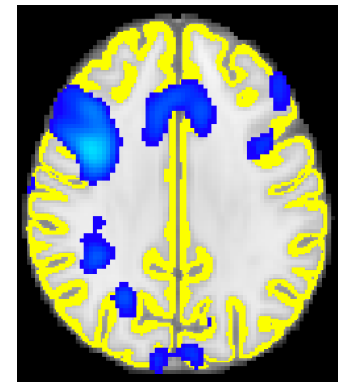

11 Easy 58

Scan 79

Scan 89

Scan 155

Scan 186

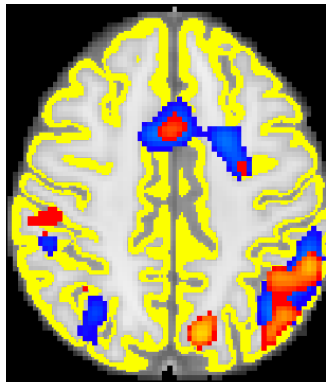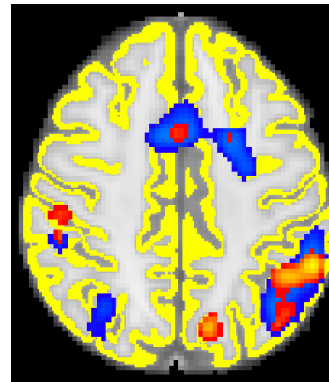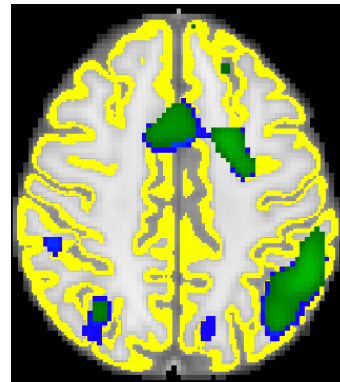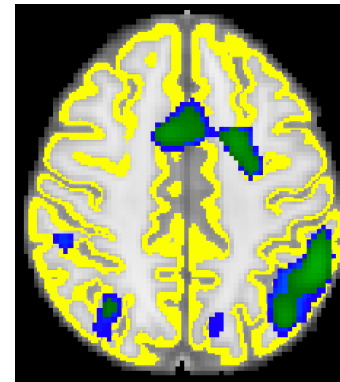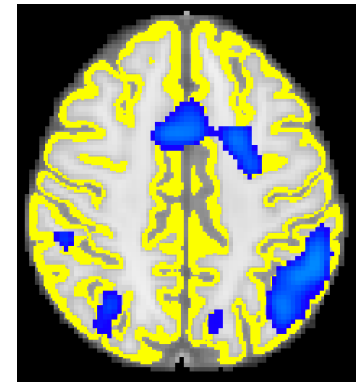

EPT

13 Easy  
Hard 57 Same as 80%

Virtually no overlap to show visually

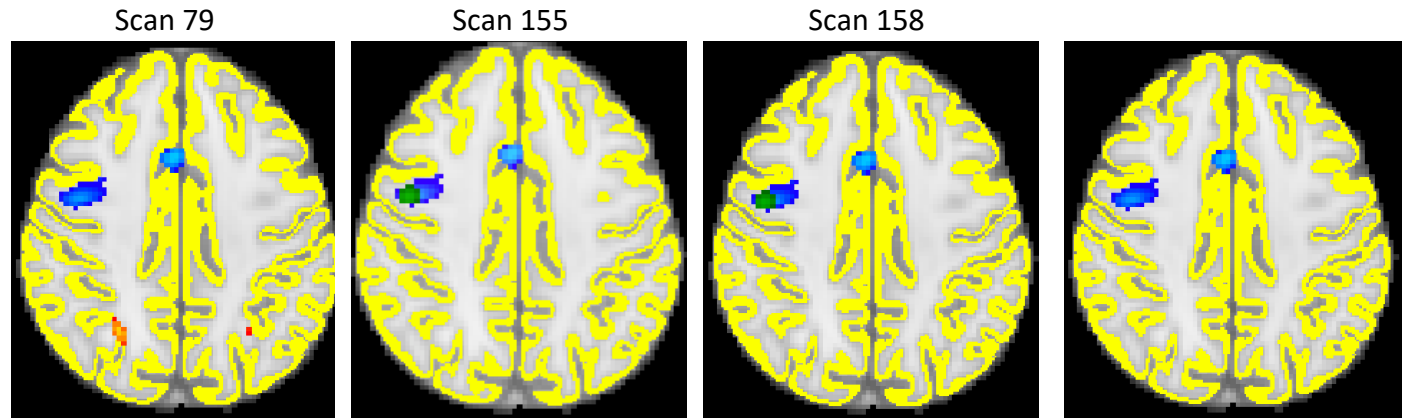

14 Hard 56 Same as 80%

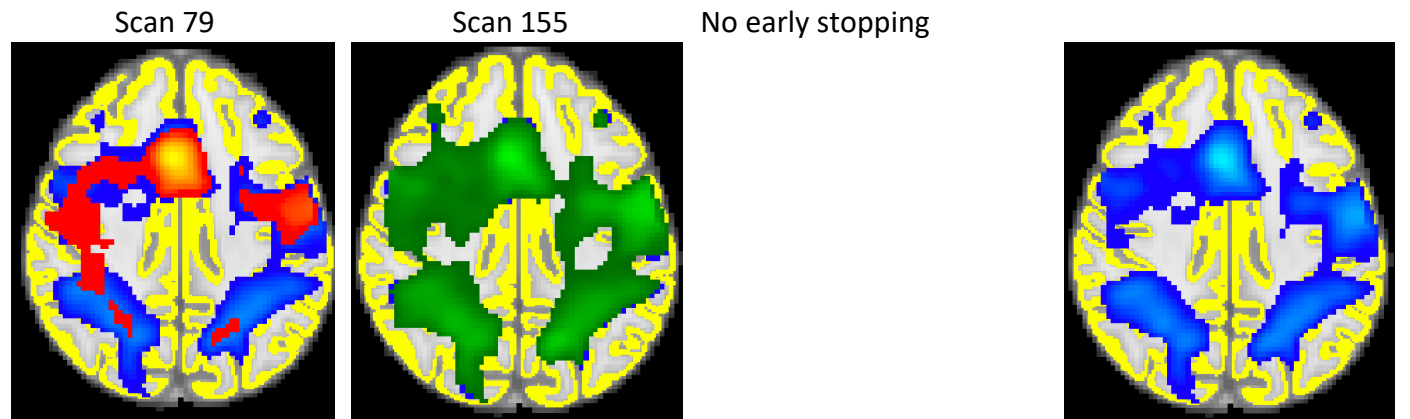

15 Easy 54 Scan 107

Scan 154 Same as 80% Scan 155

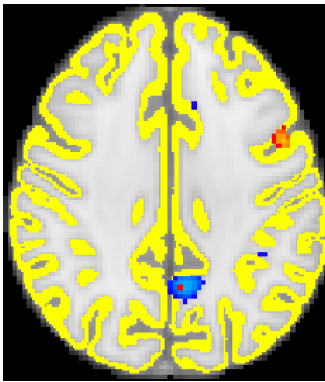

Scan 79

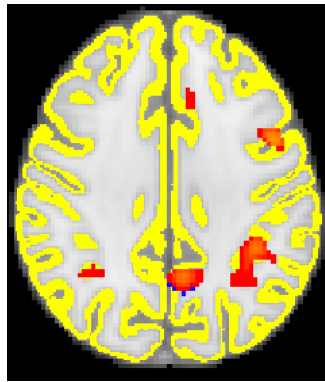

Scan 87

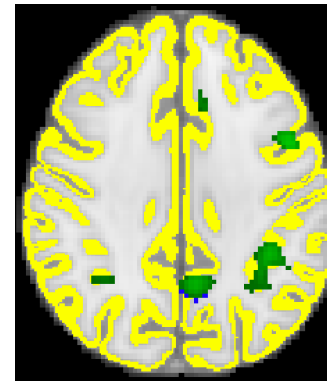

Scan 155

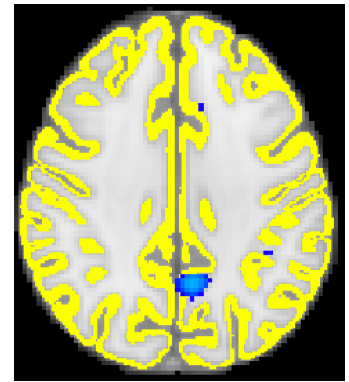

No early stopping

Hard 51

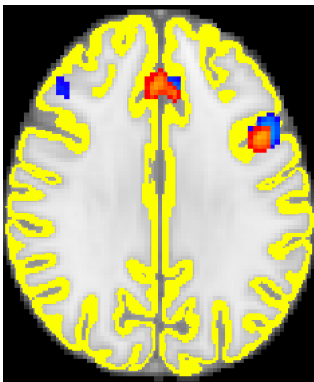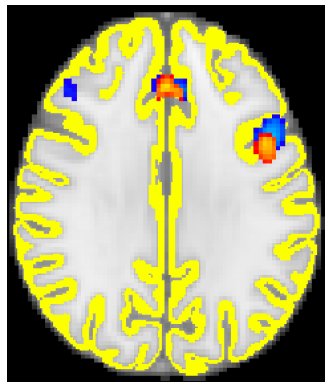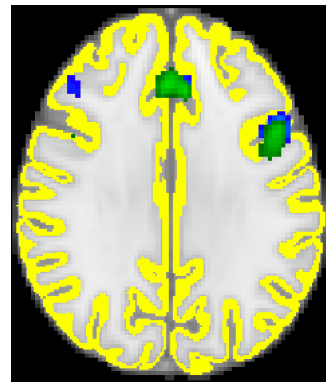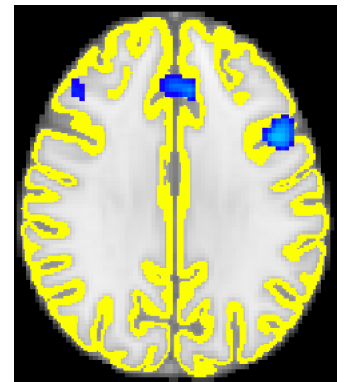

17 Easy 57

Same as 80%

Scan 79

Scan 155

Scan 216

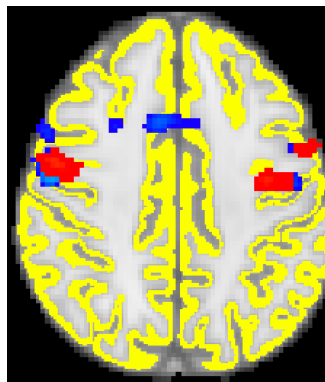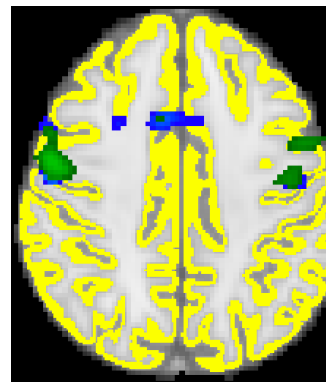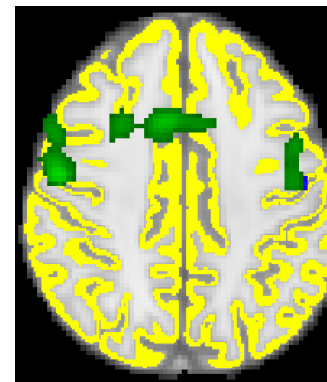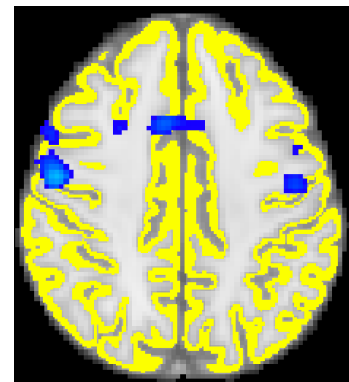

Hard 58

Same as 80%

Scan 79

Scan 155

Scan 218

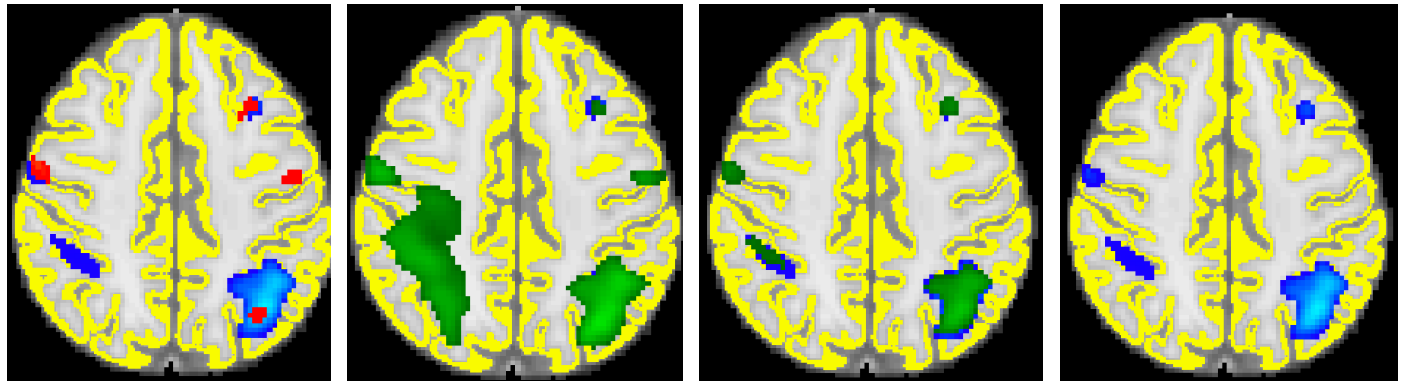

18 Easy 49 Same as 80%

Scan 79

Same as 80%

Scan 155

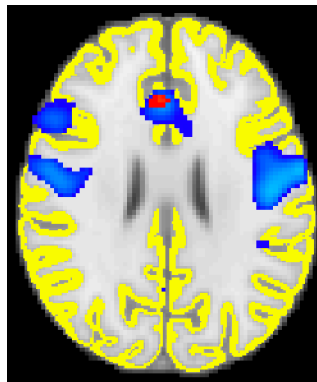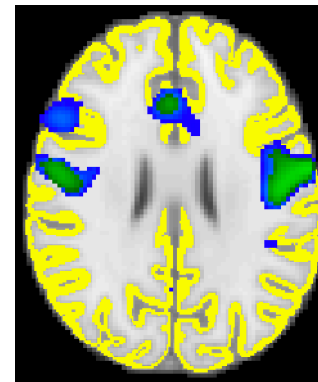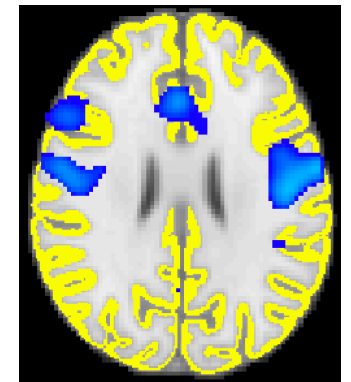

19 Hard 61 Same as 80%

Scan 79

Same as 80%

Scan 155

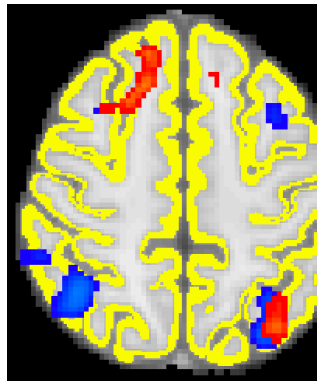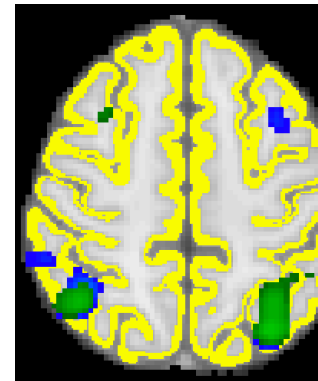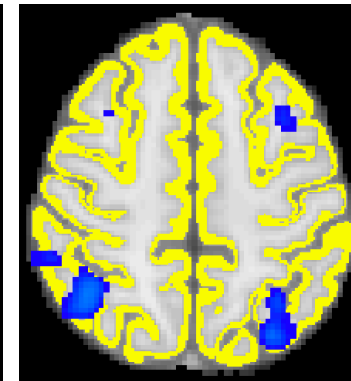

20 Easy 54 Same as 80%

Scan 79

Same as 80%

Scan 155

Hard 54 Same as 80%

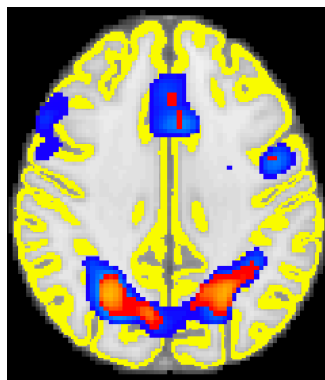

Scan 79

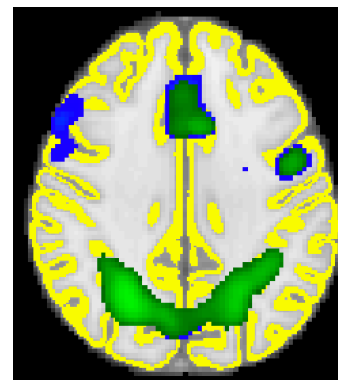

Scan 155

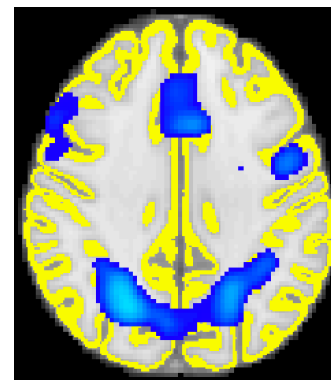

Scan 159

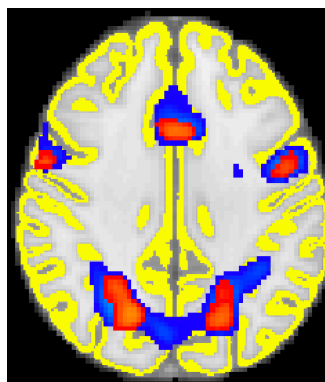

Scan 79

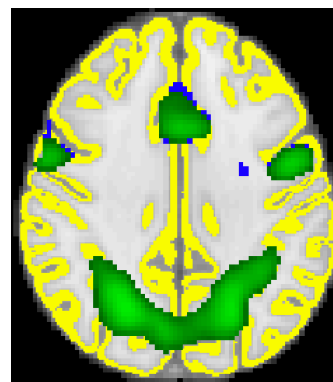

No early stopping

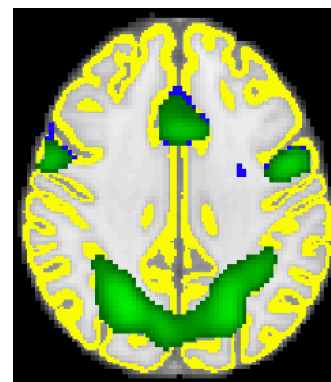

No early stopping

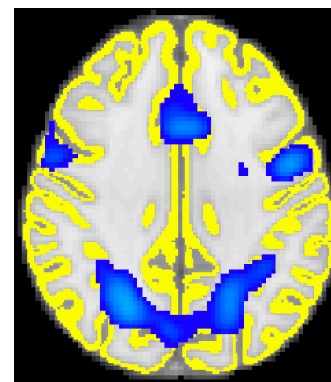

21 Hard 28 Same as 80%

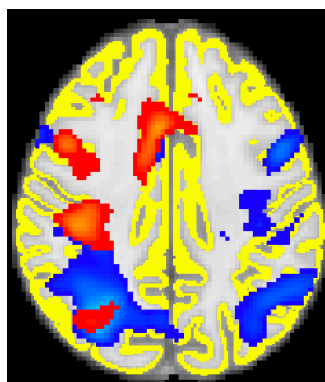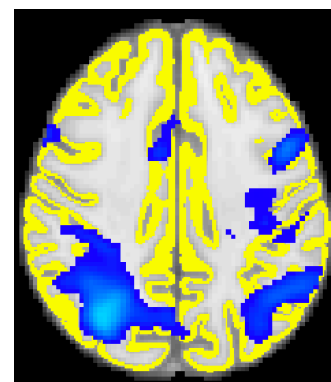



**Table S2:** Plots of the percentage of voxels classified as active and non-active at each scan number for each difficulty level for each subject. Information is given from scan 79 to 238.

| Subject      | Total number of voxels | Classification of voxels by scan number |
|--------------|------------------------|-----------------------------------------|
| Control<br>1 | 115,062                |                                         |

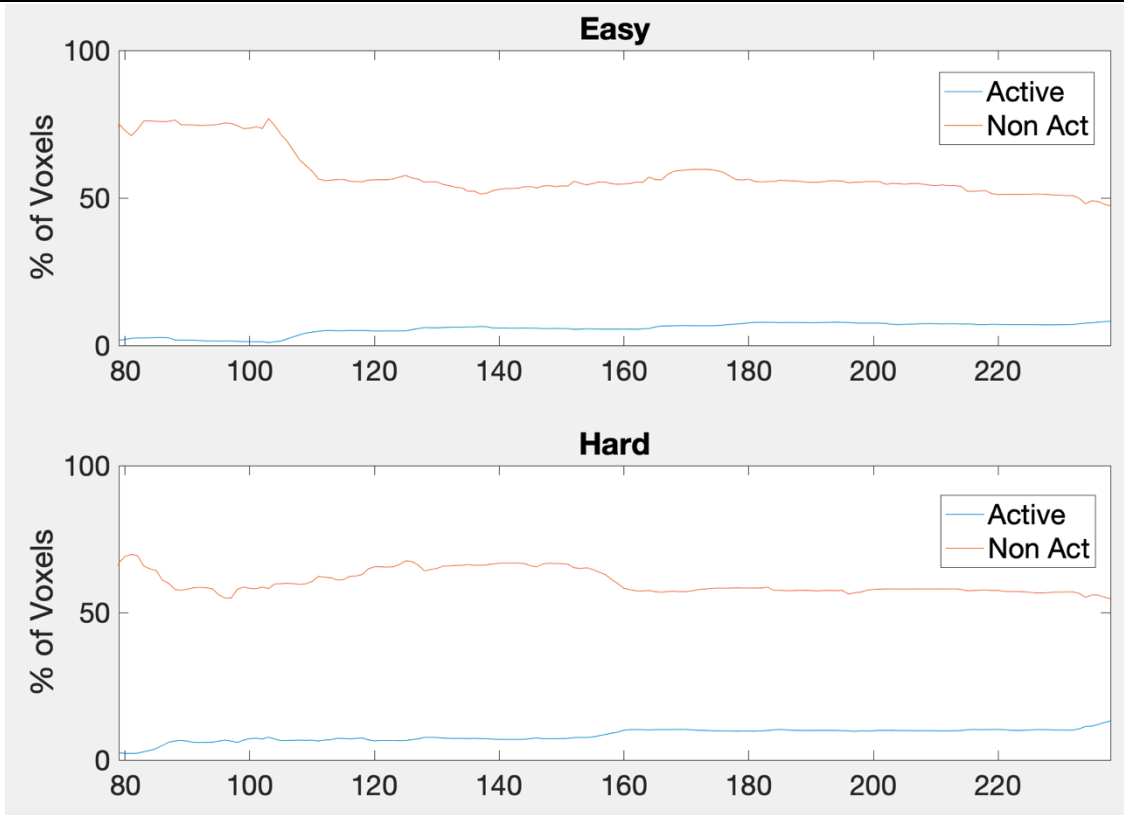

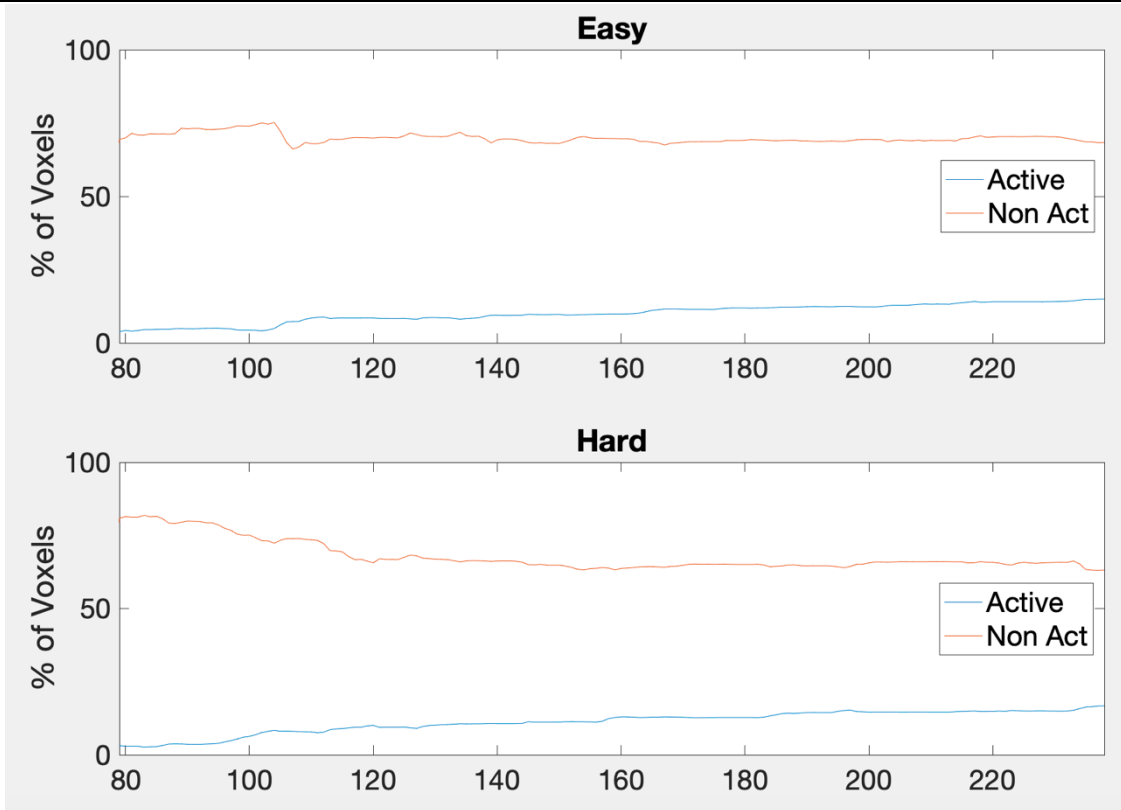

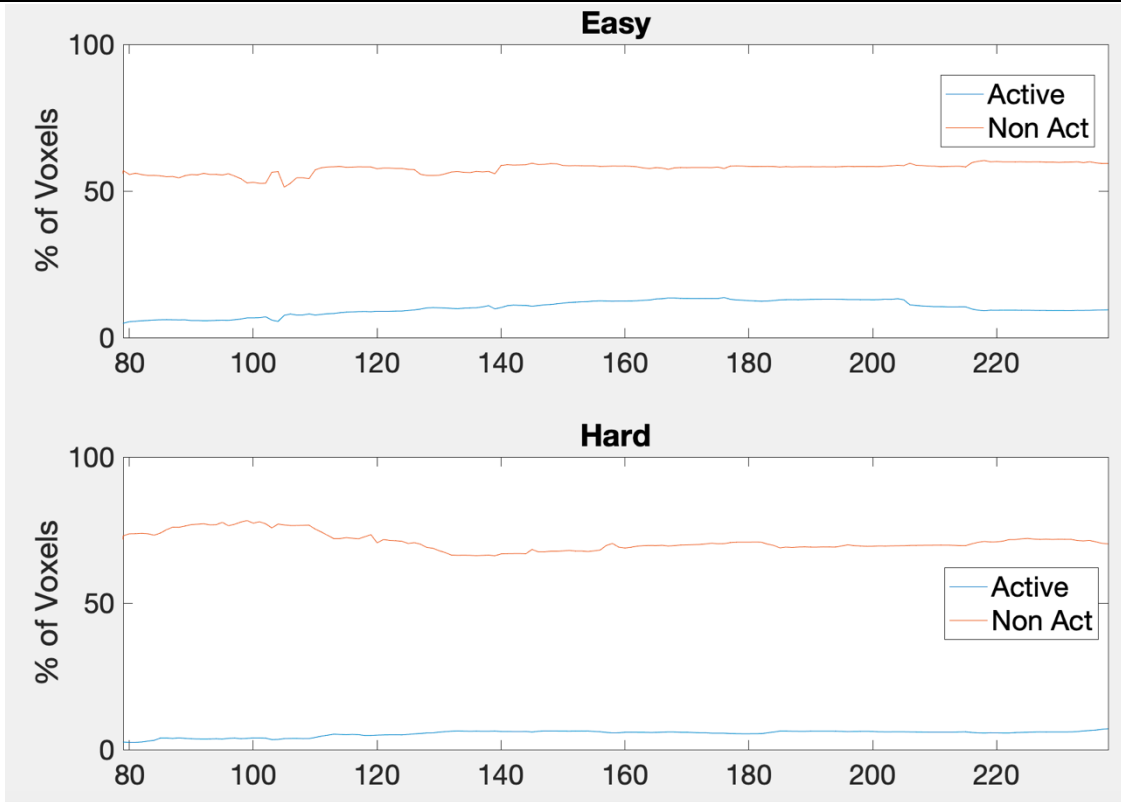

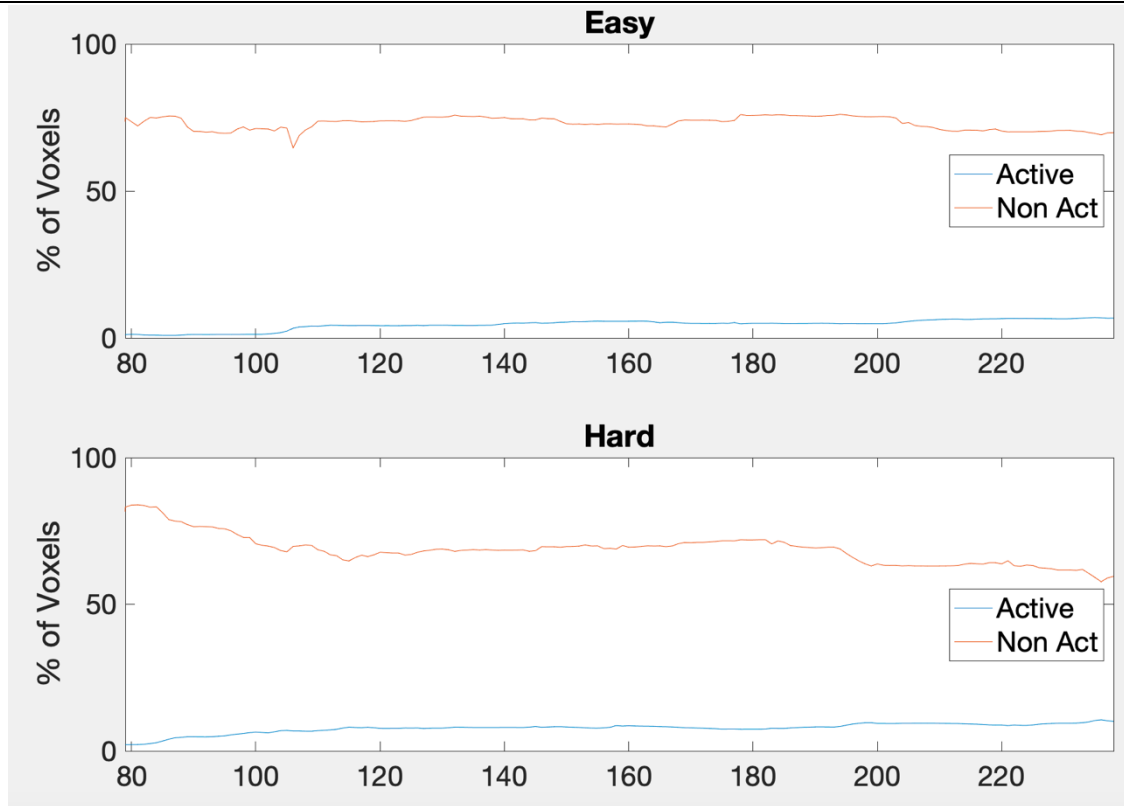

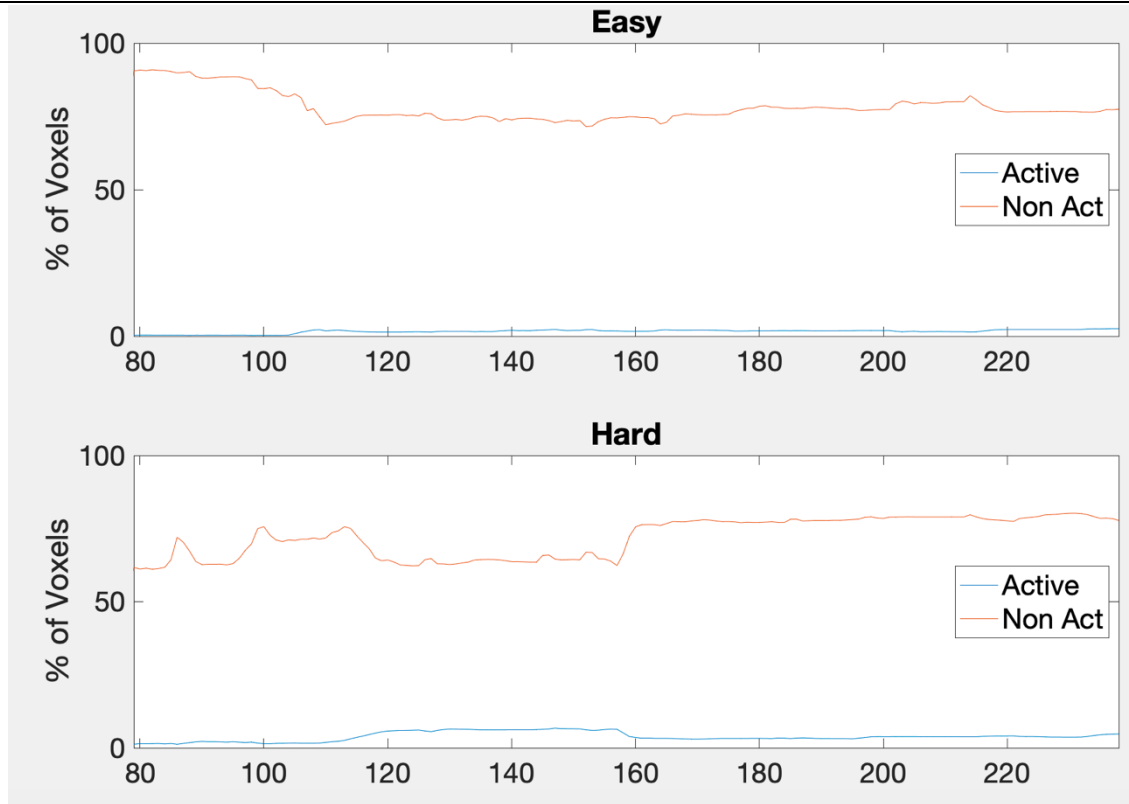

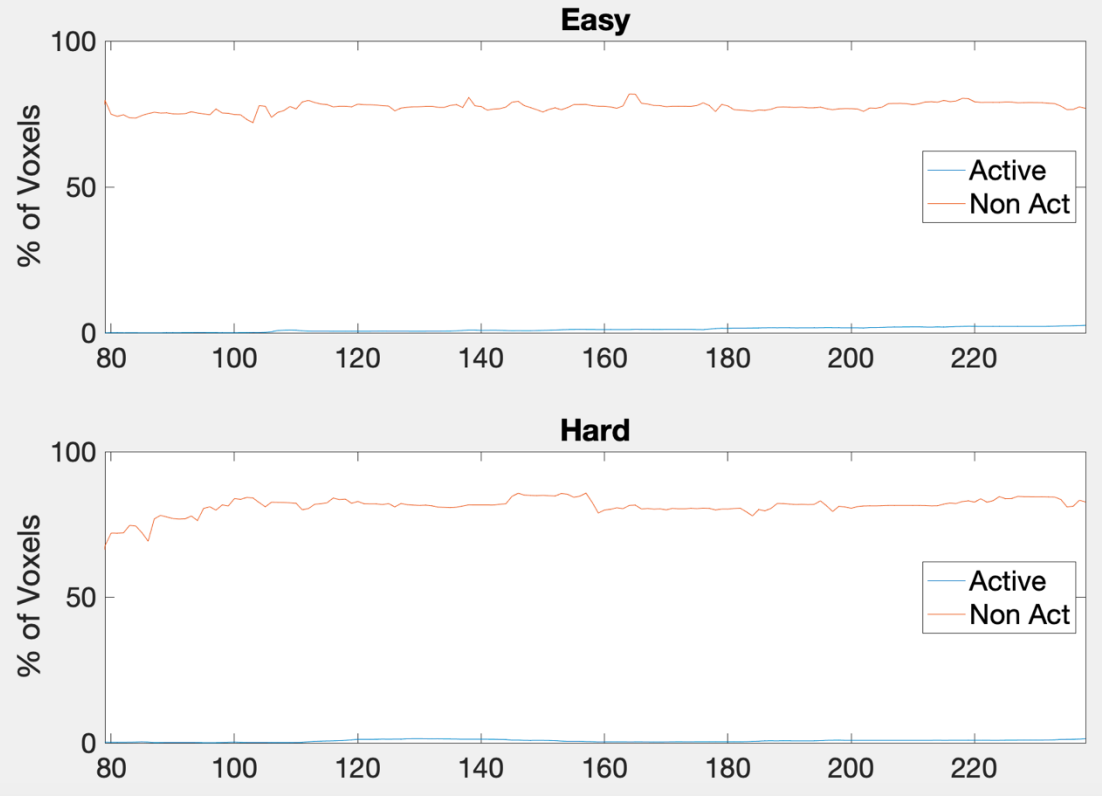

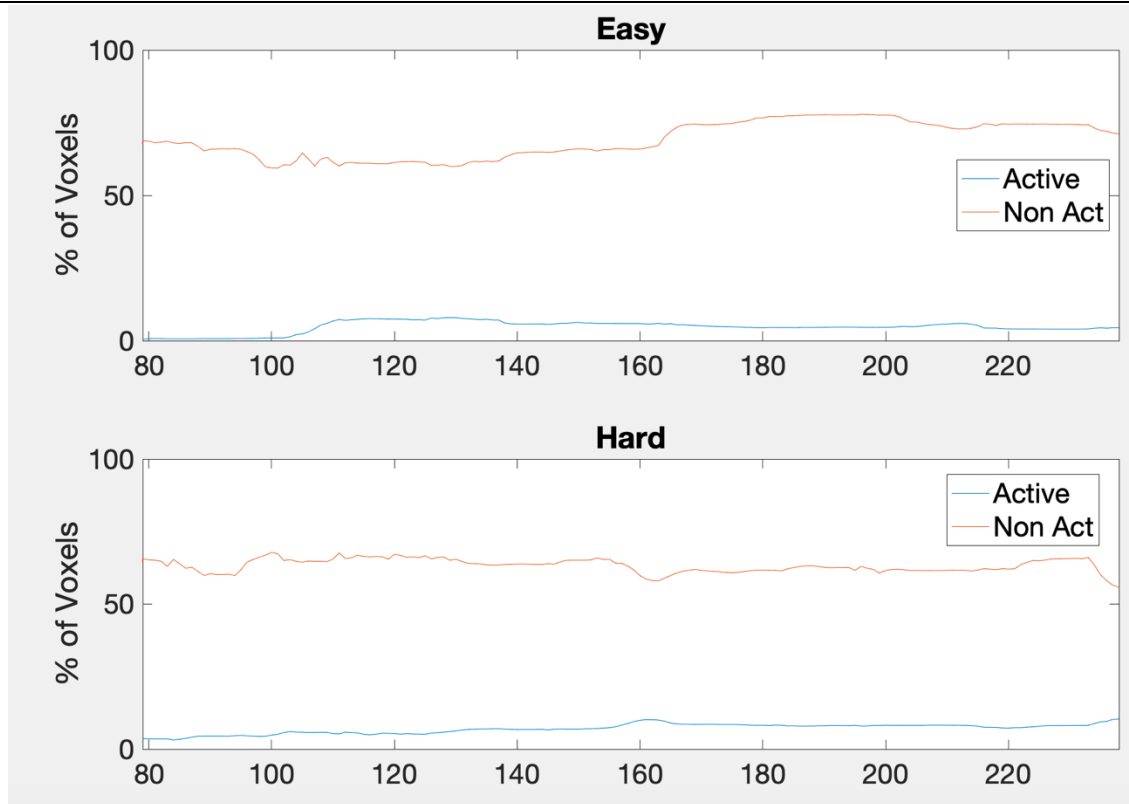



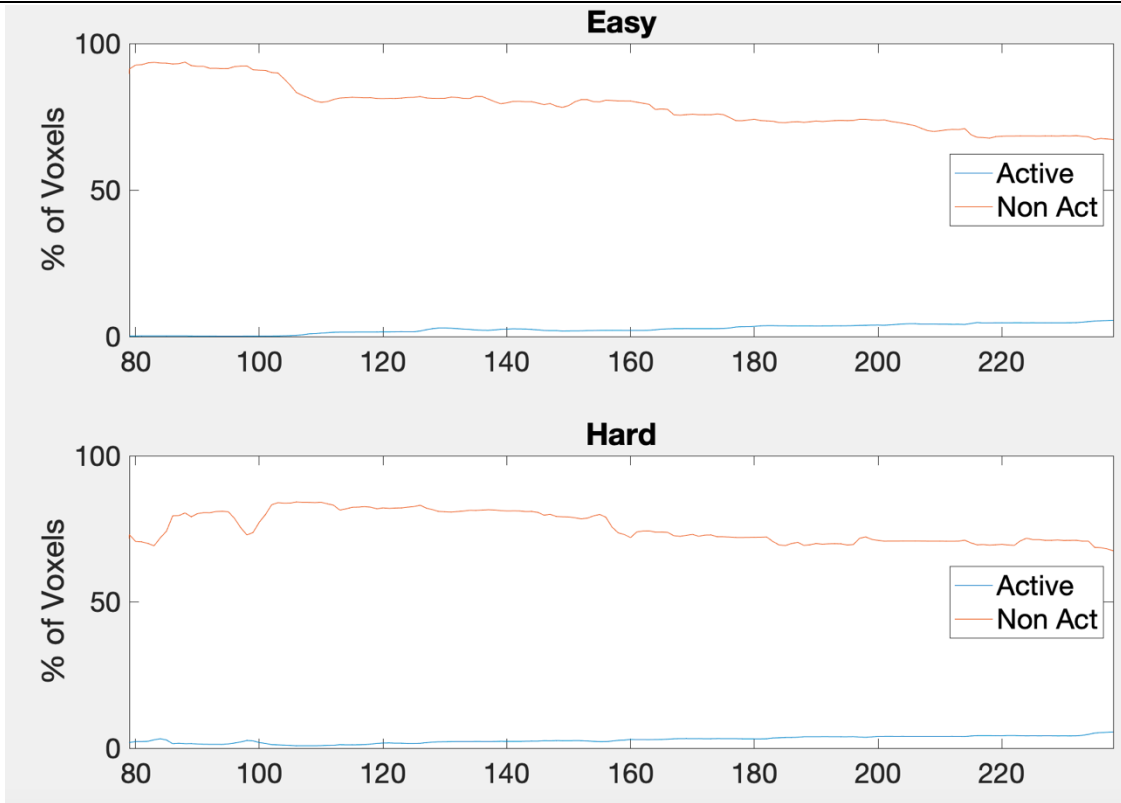

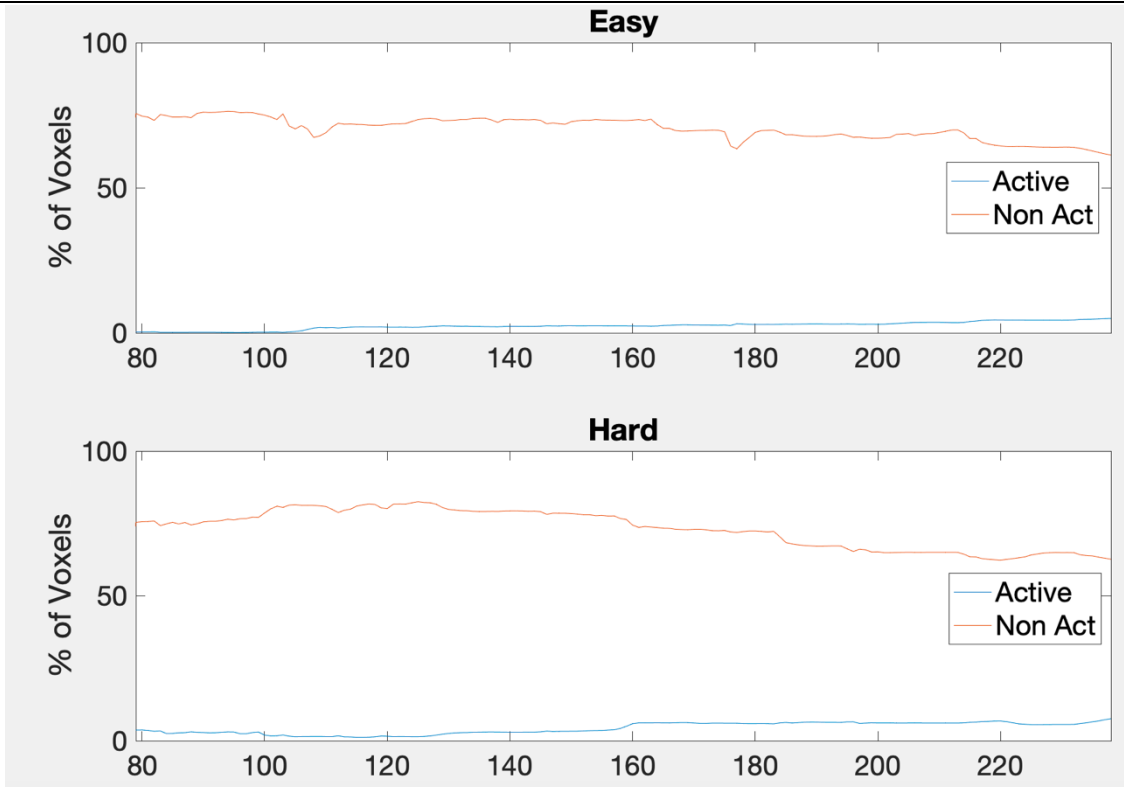

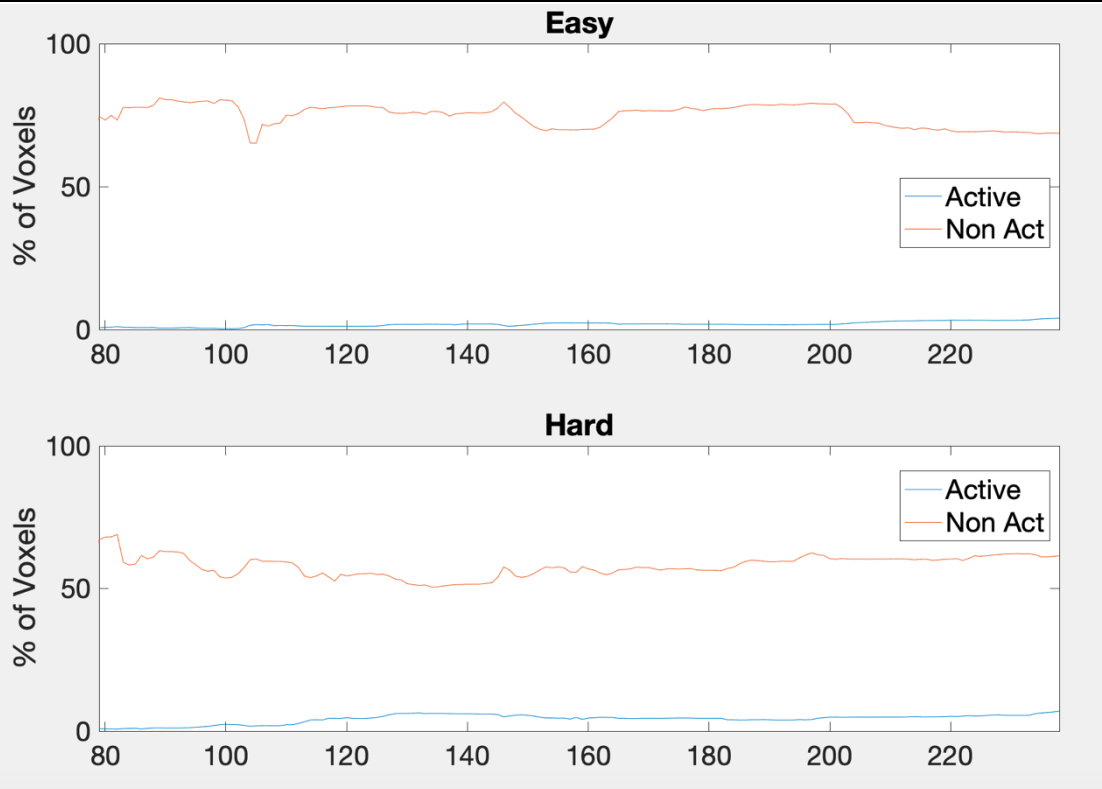

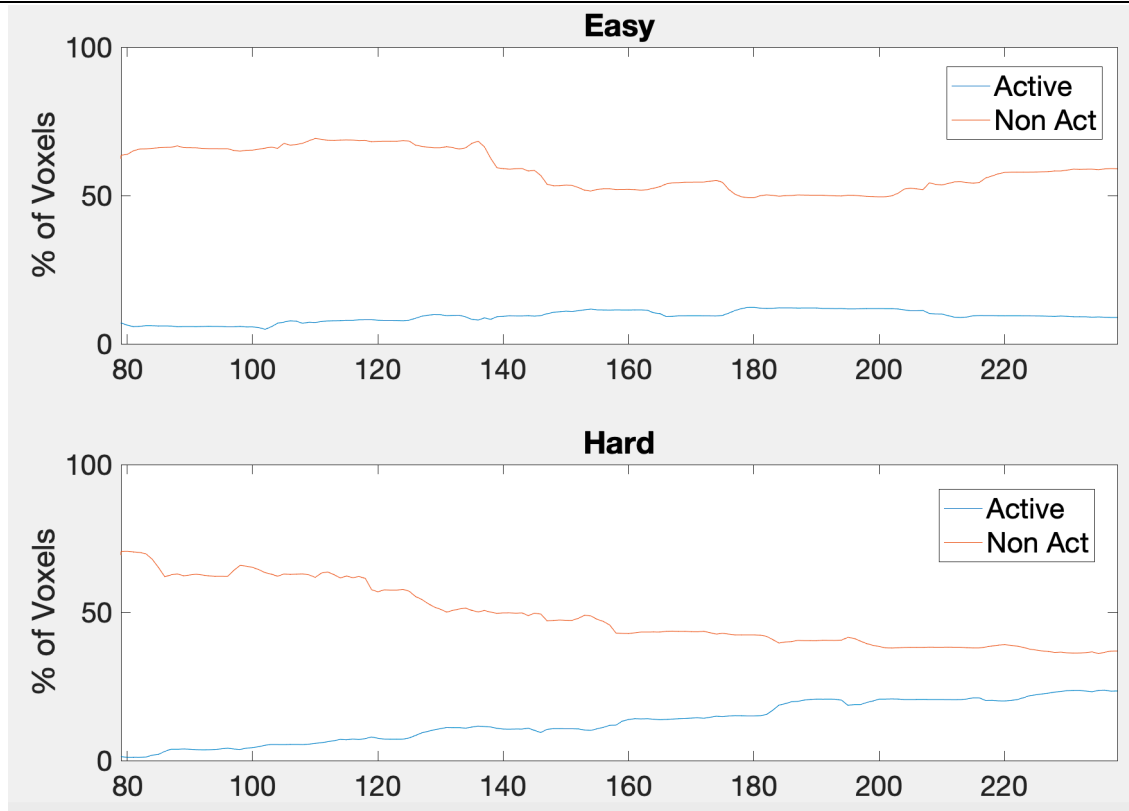

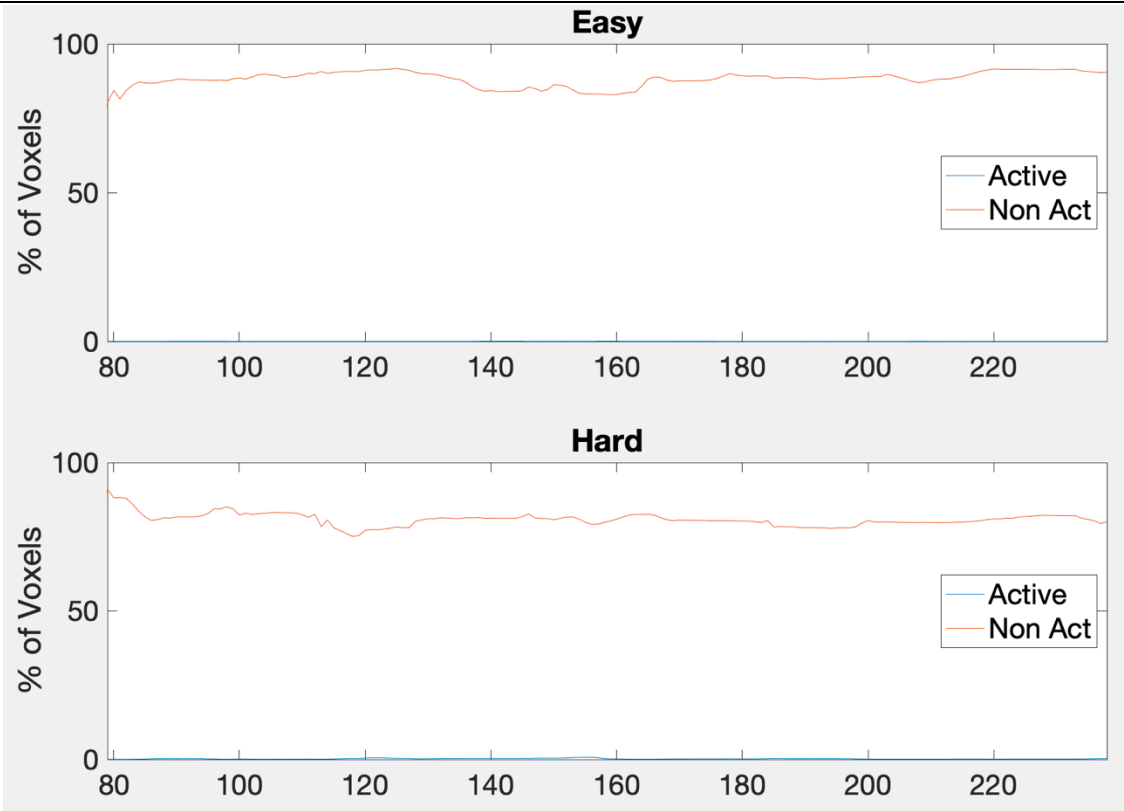

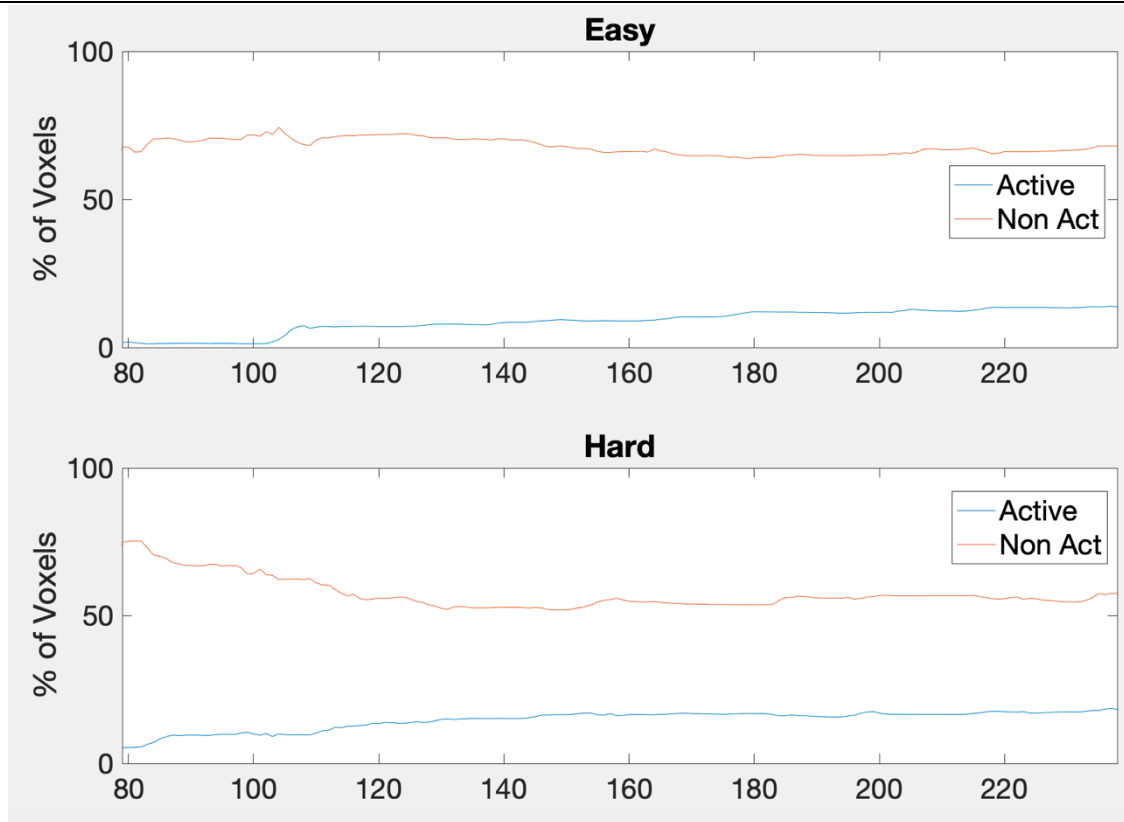

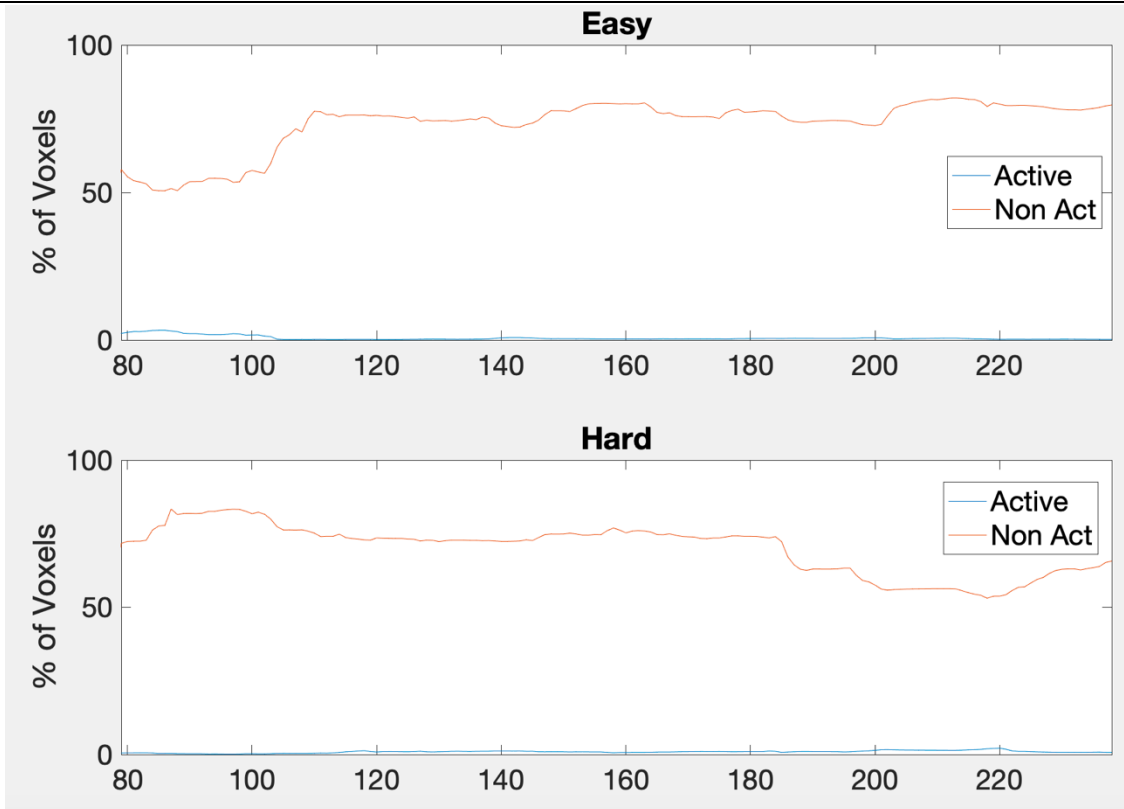

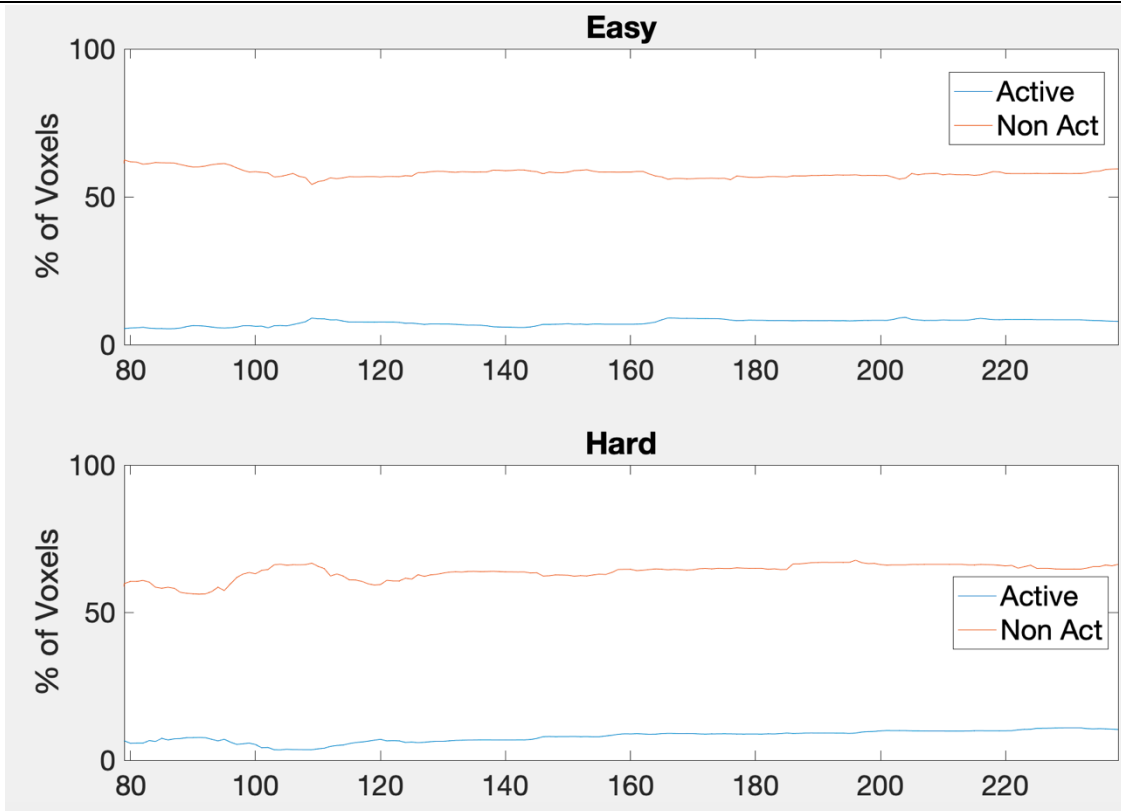



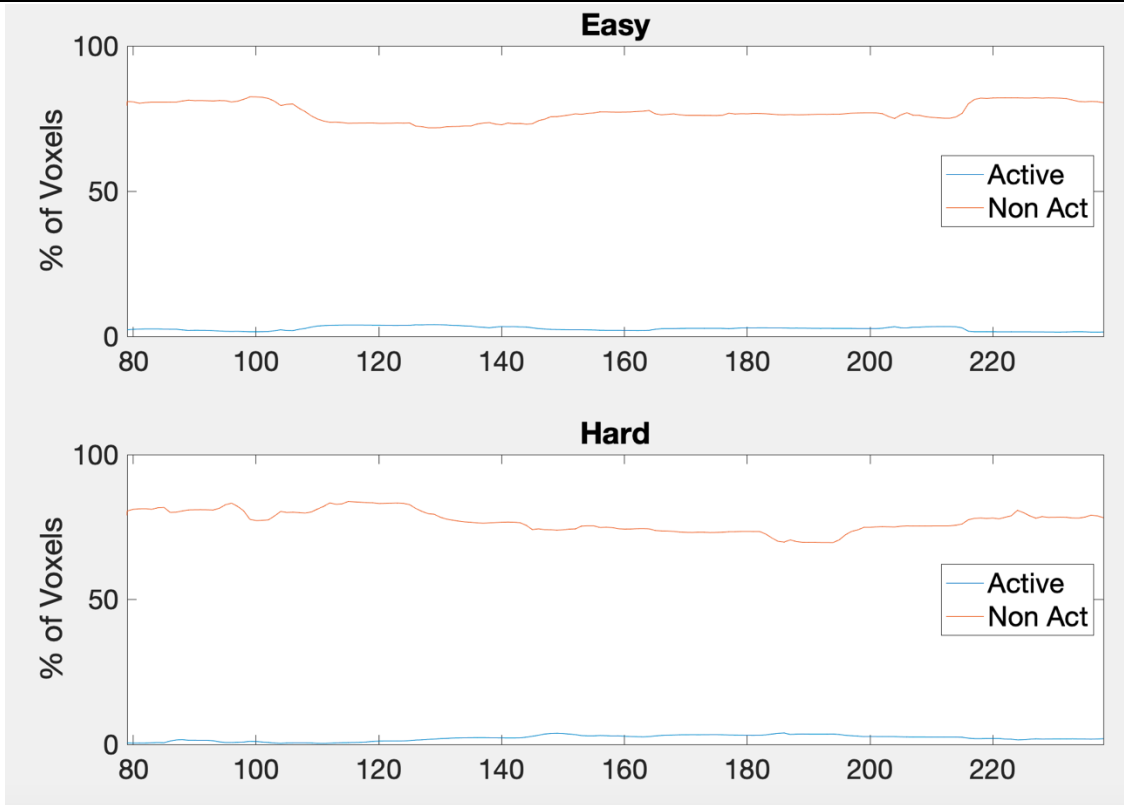

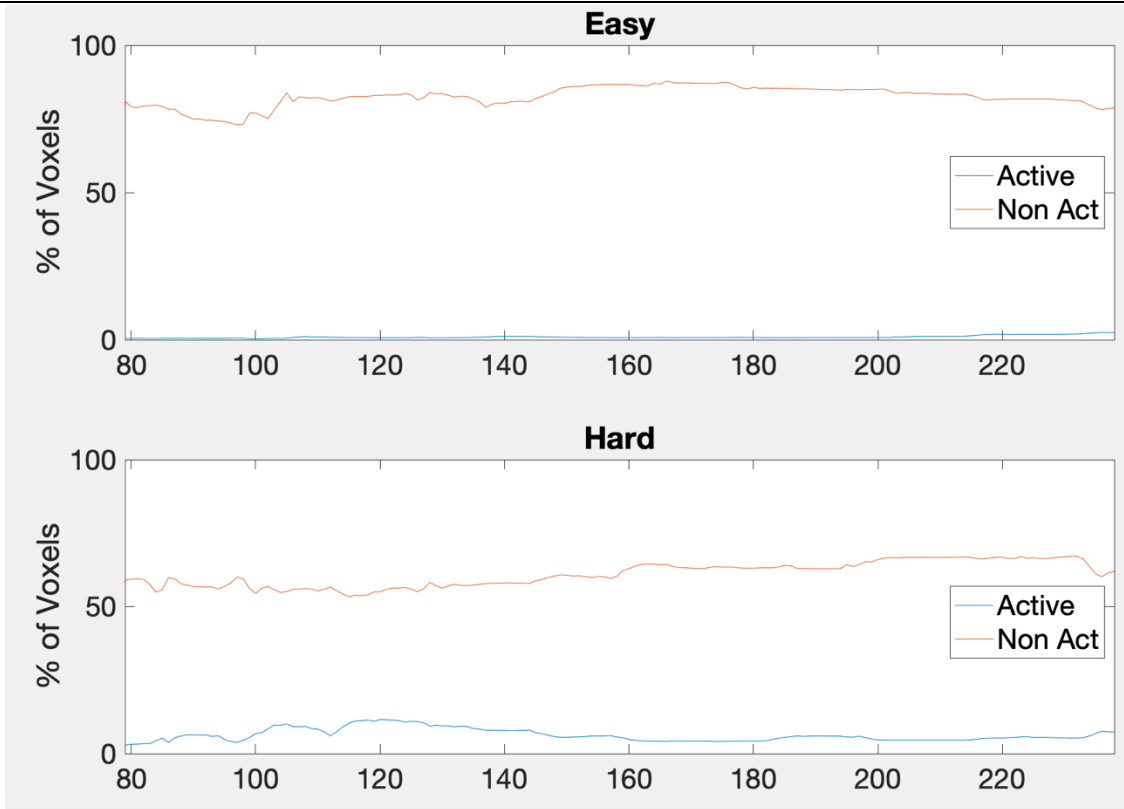

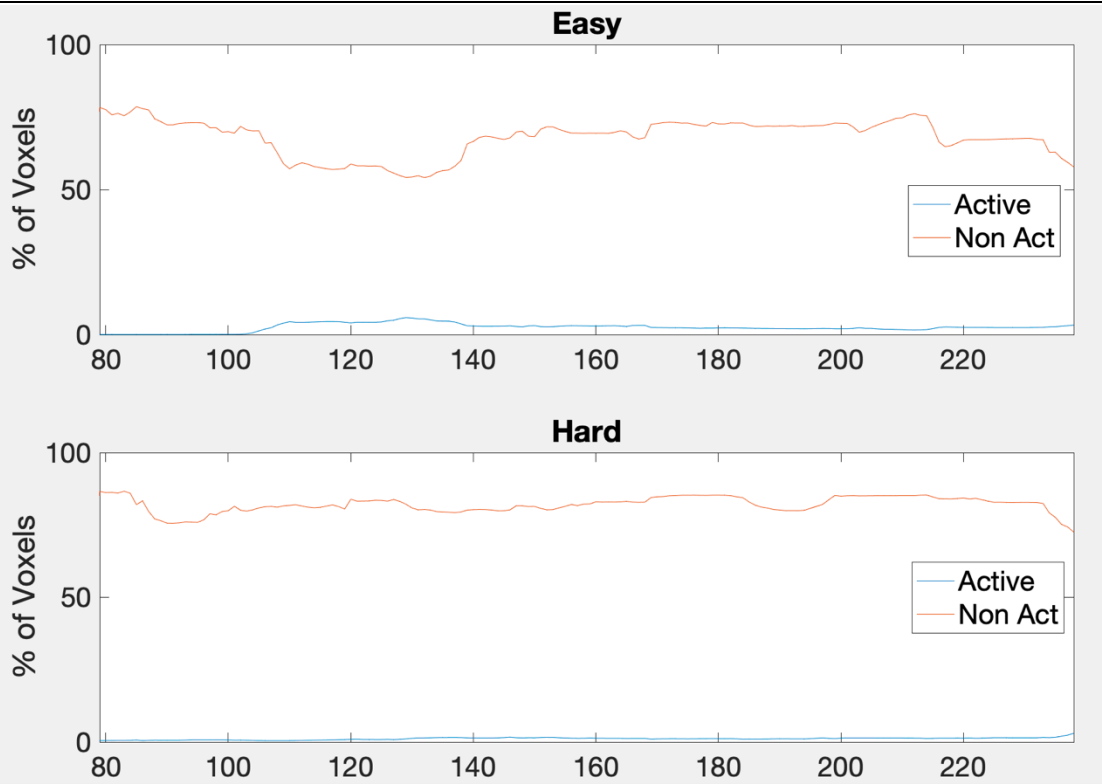

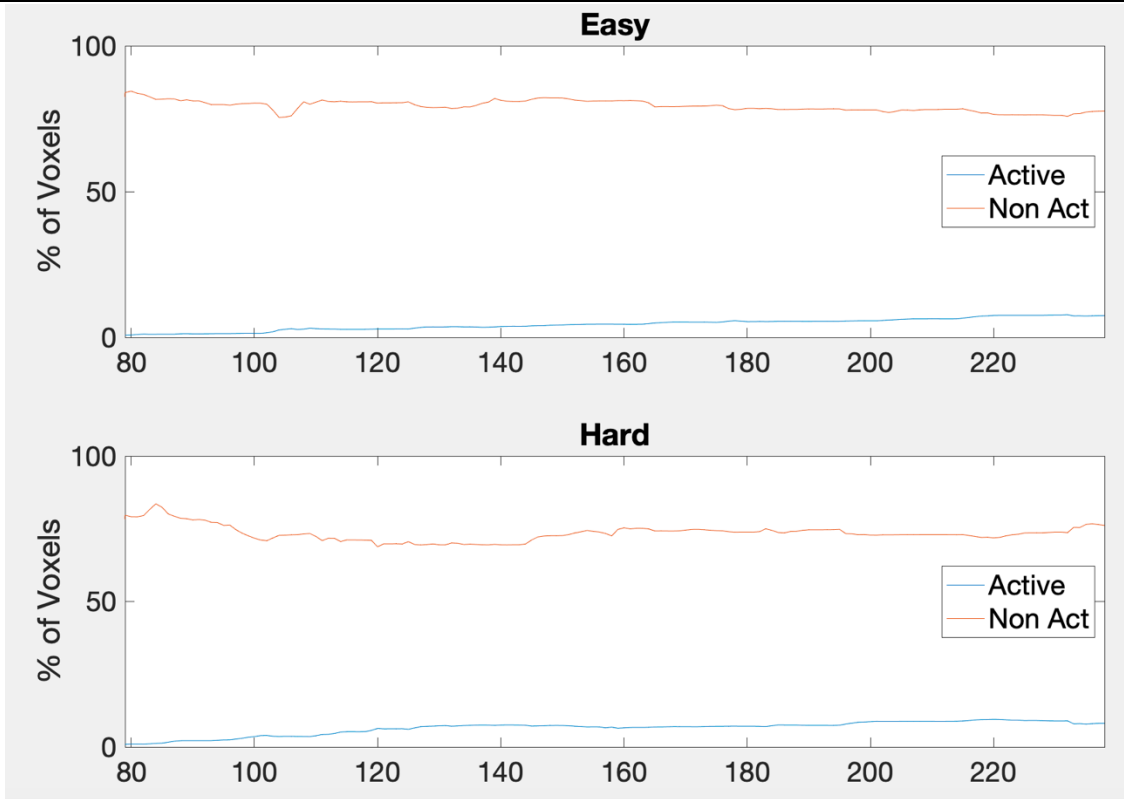

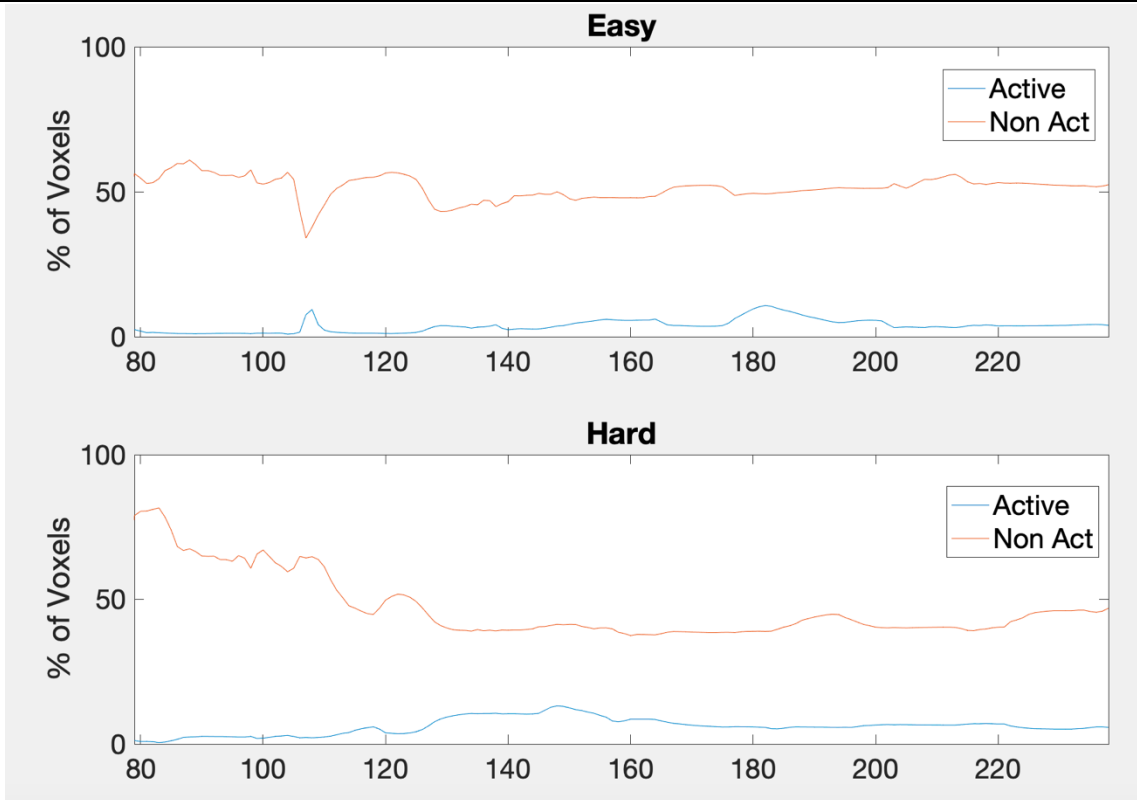

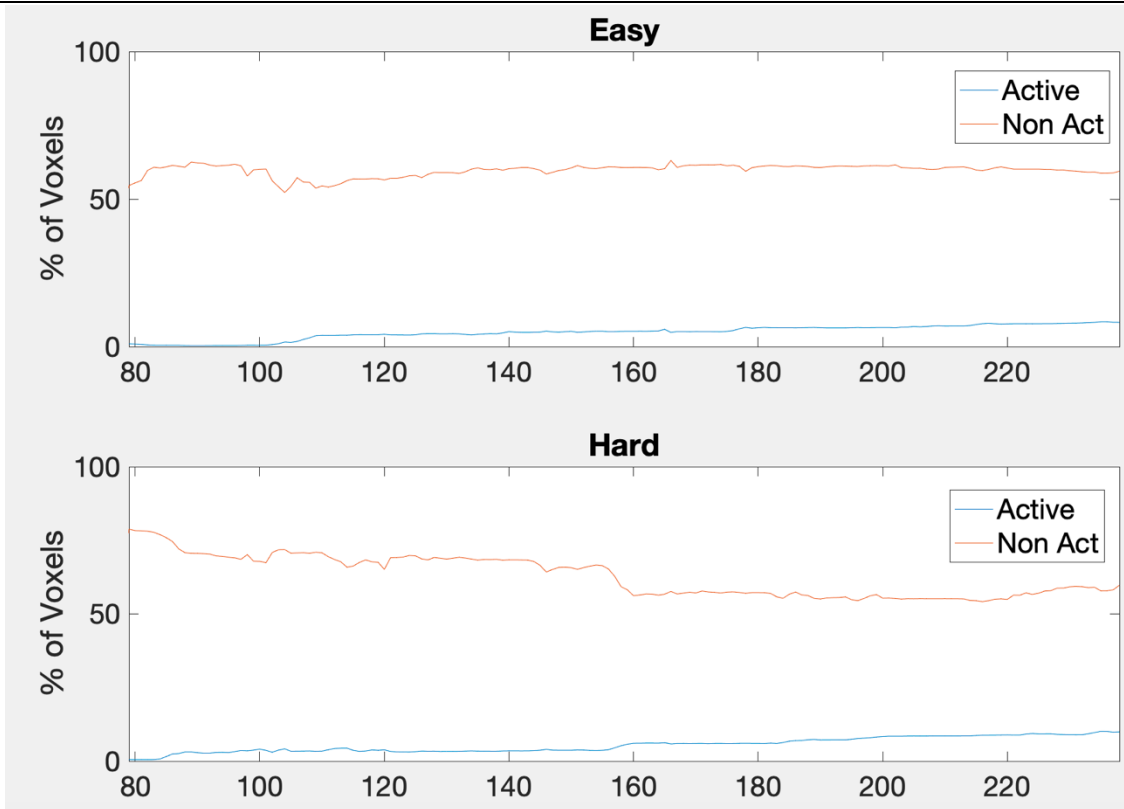

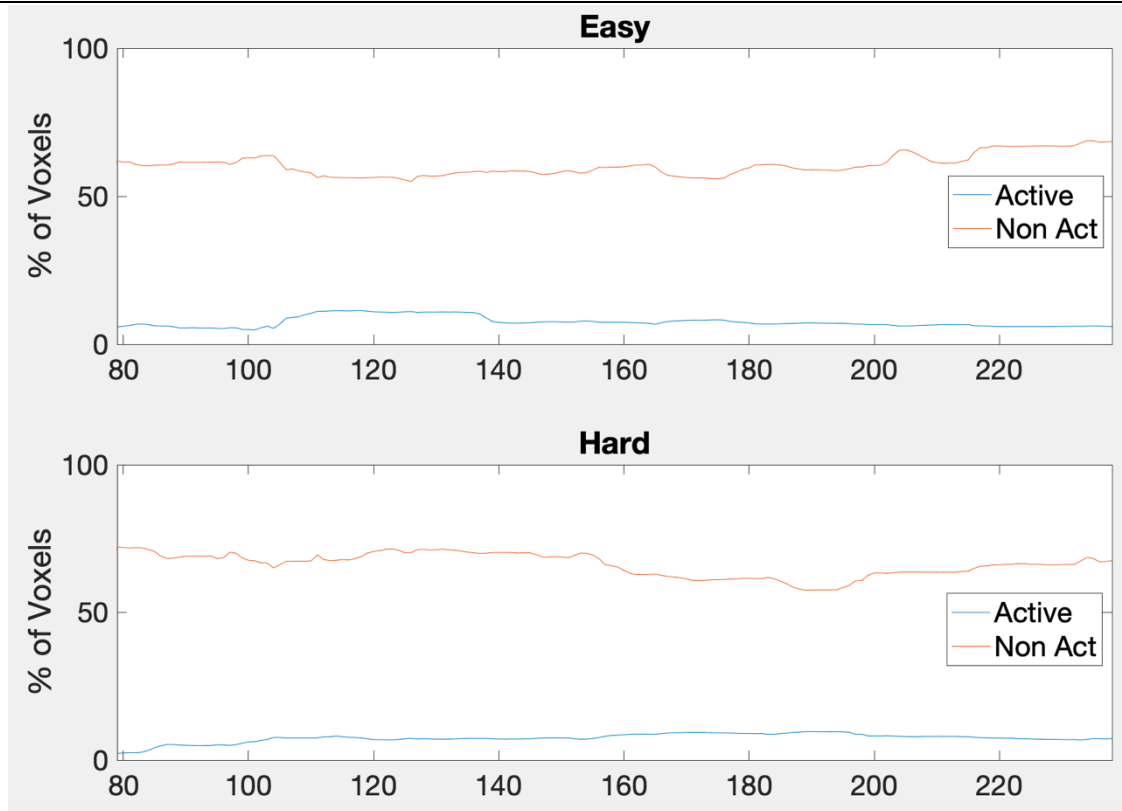

**Table S3:** Plots of framewise displacement and subject responses. 1<sup>st</sup> panel (top): framewise displacement estimation from motion parameters. 2<sup>nd</sup> panel: Subject responses for easy level, y-axis magnitude indicates time taken to respond. 3<sup>rd</sup> Panel: hard level subject responses, y-axis magnitude indicates time taken to respond. 4<sup>th</sup> panel (bottom): the duration of the easy and hard level blocks are shown for reference along with the timing of the expected responses during each block ('Exp' – timing of the expected response).

| Subject | Motion and response plots |
|---------|---------------------------|
| Control |                           |

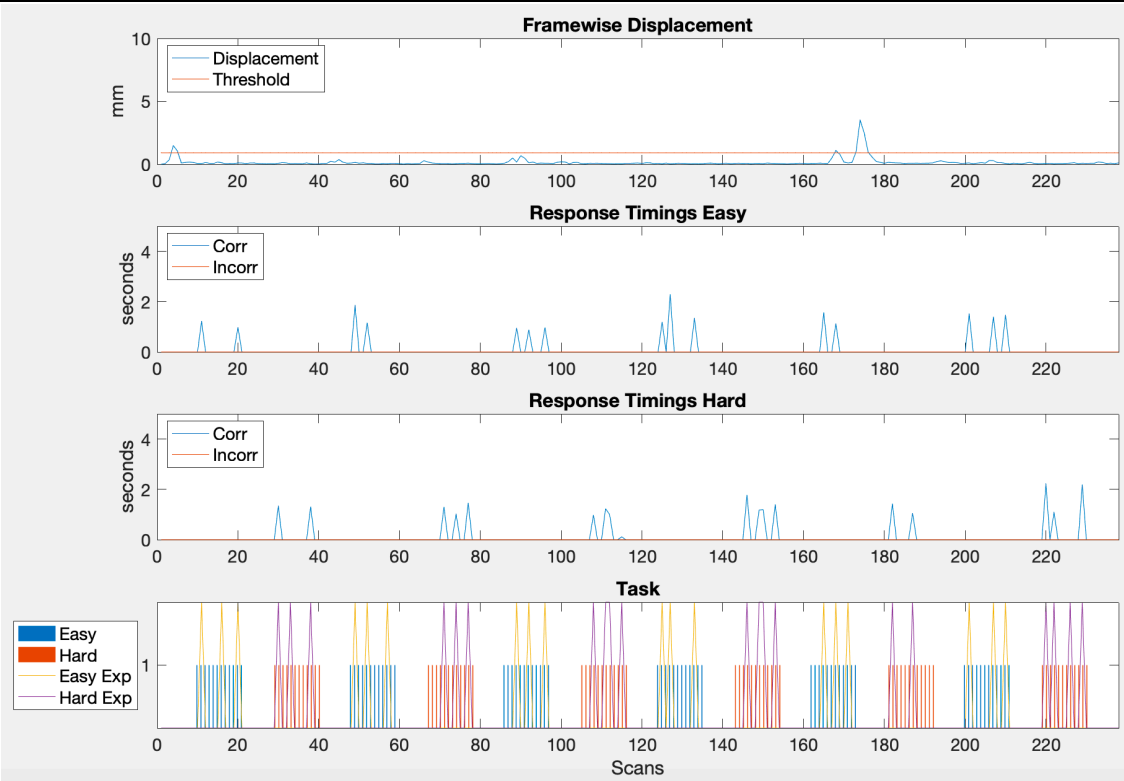



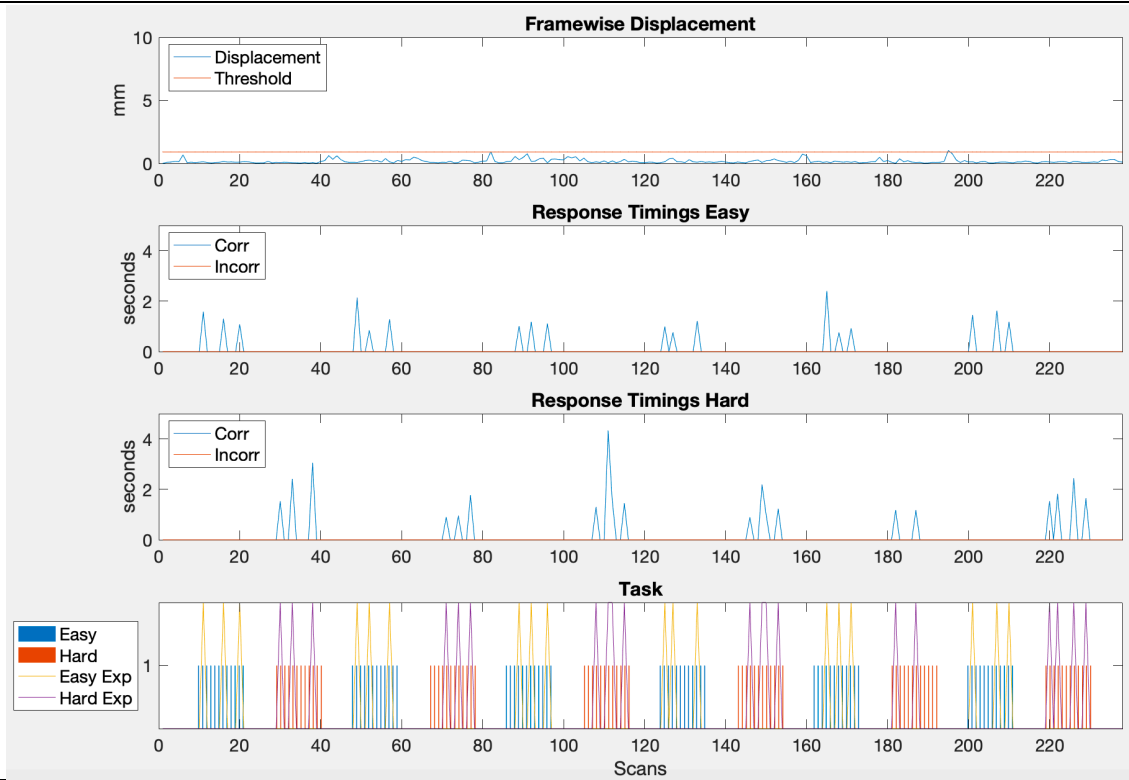

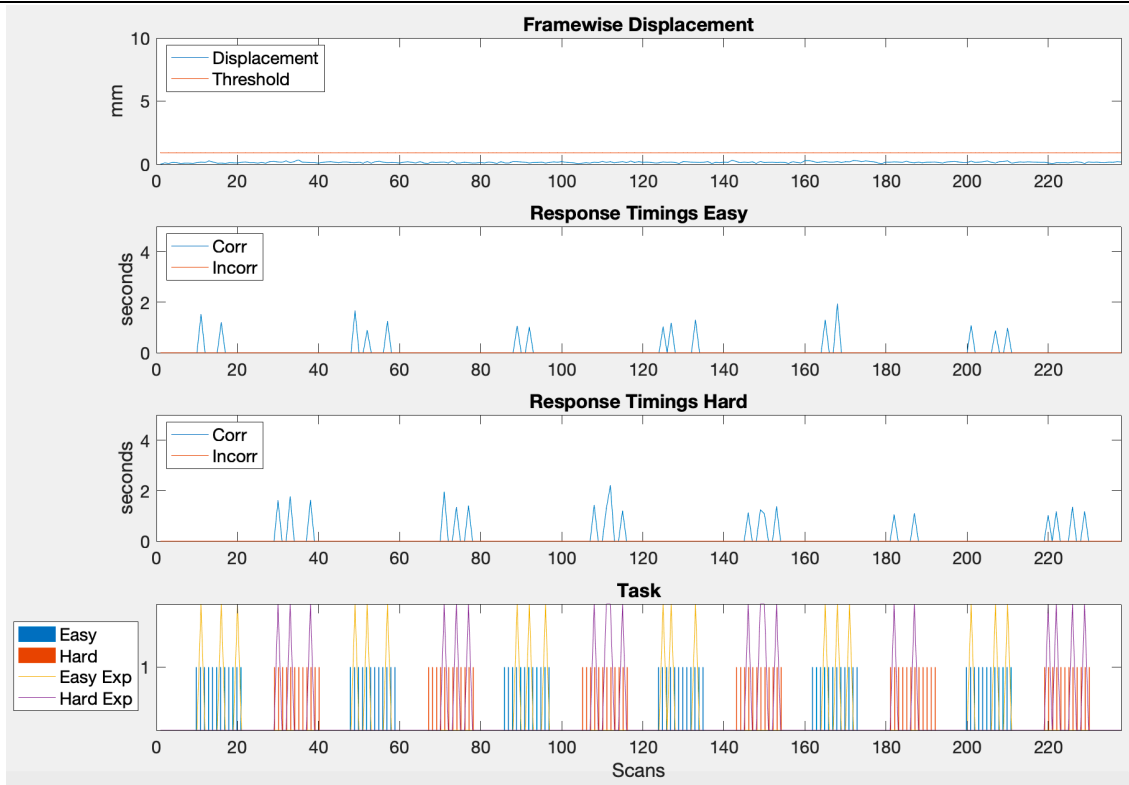

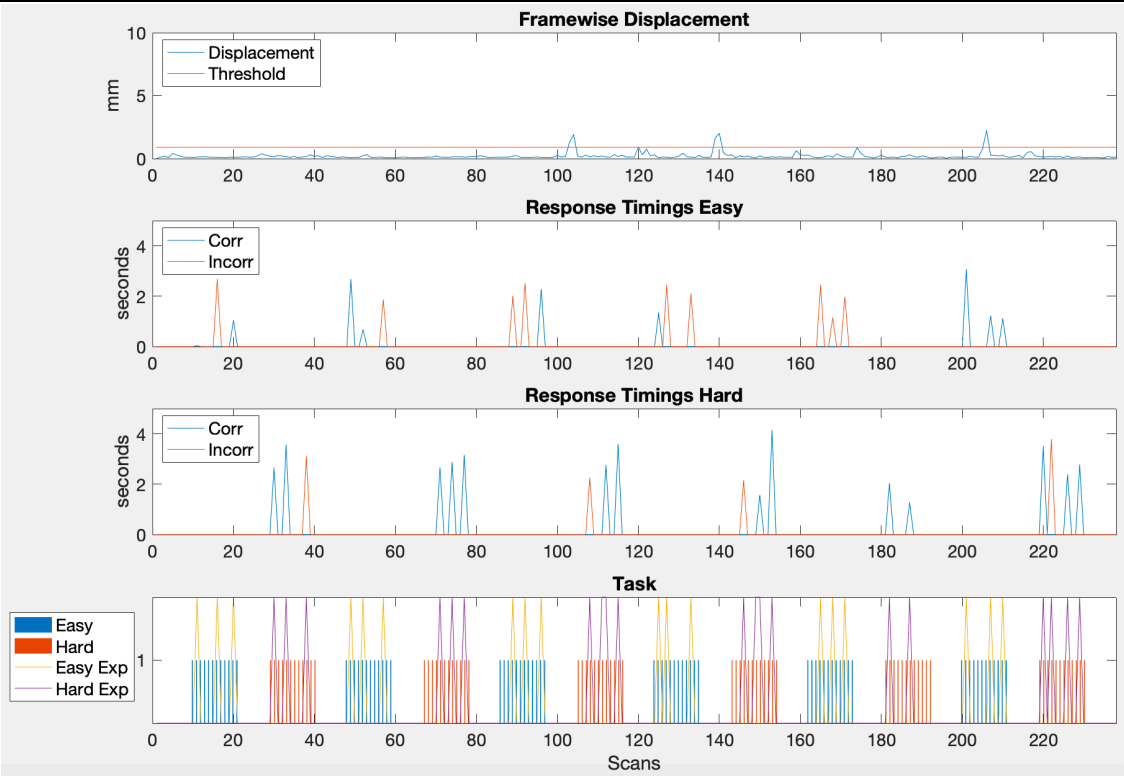

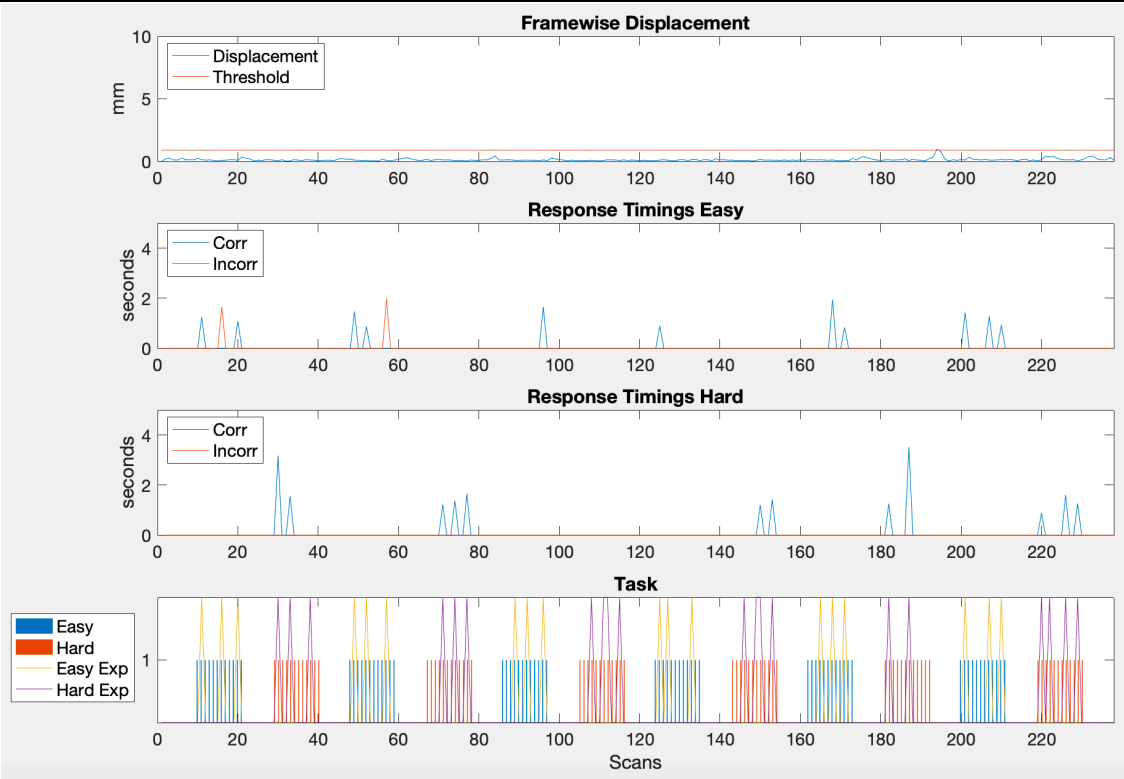

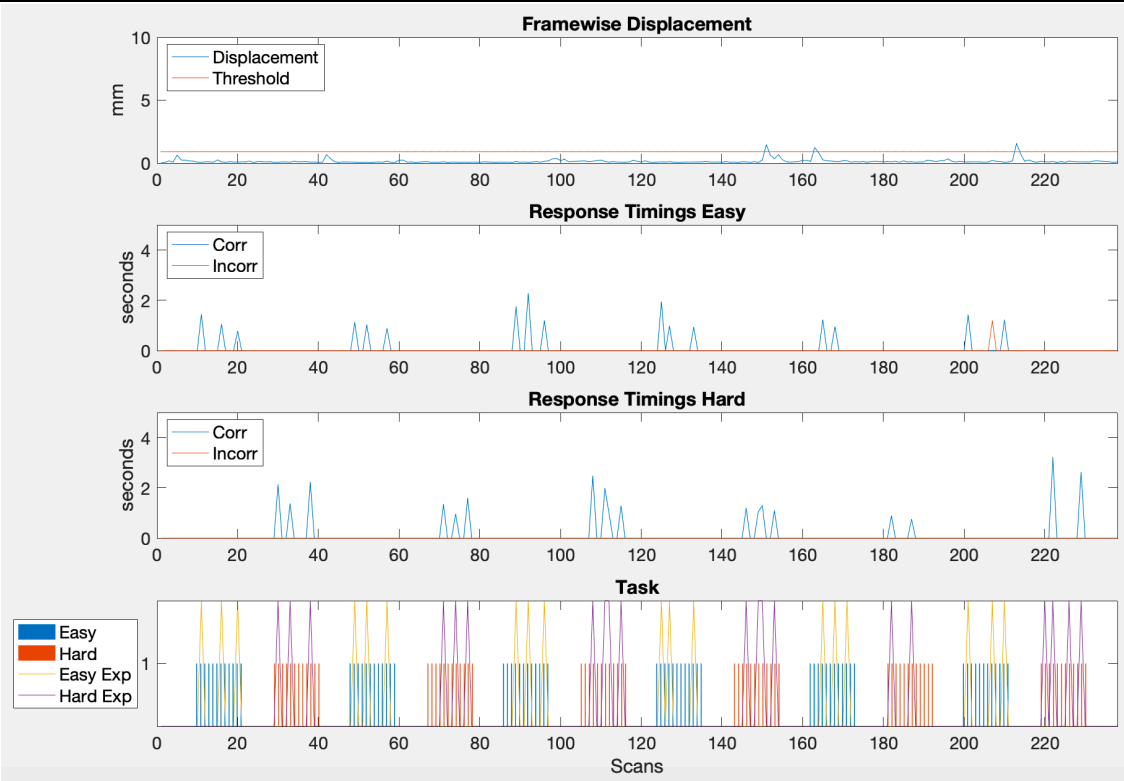

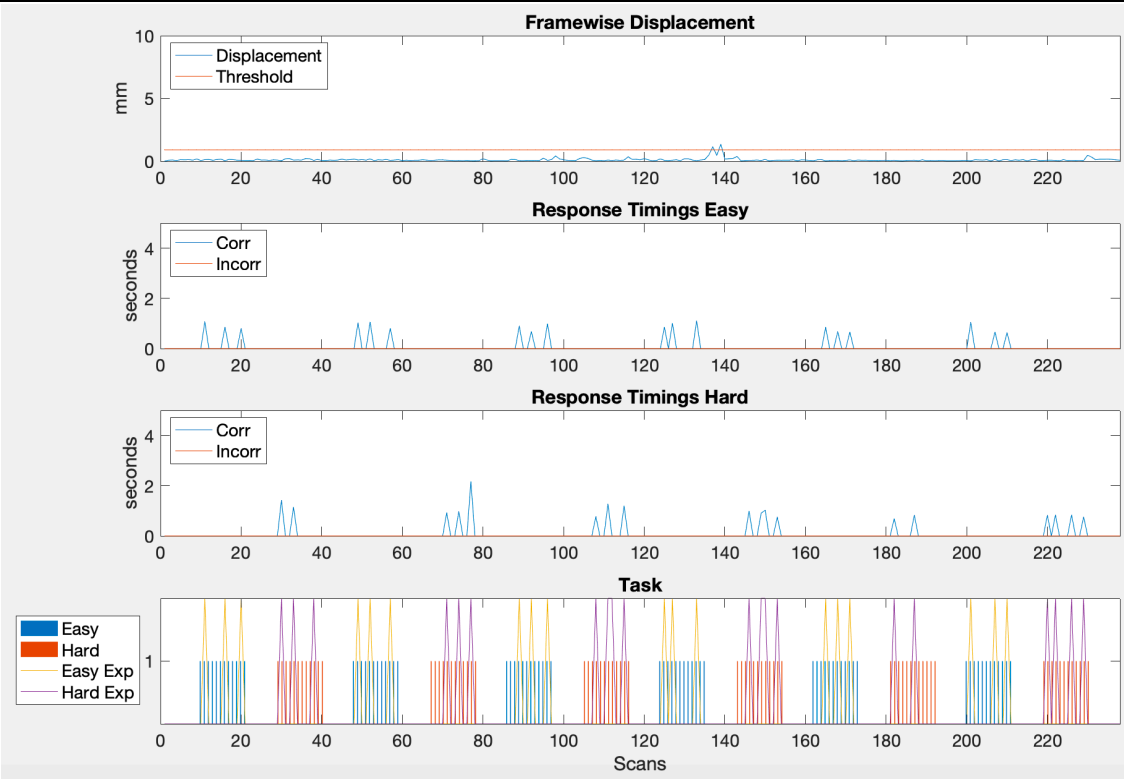

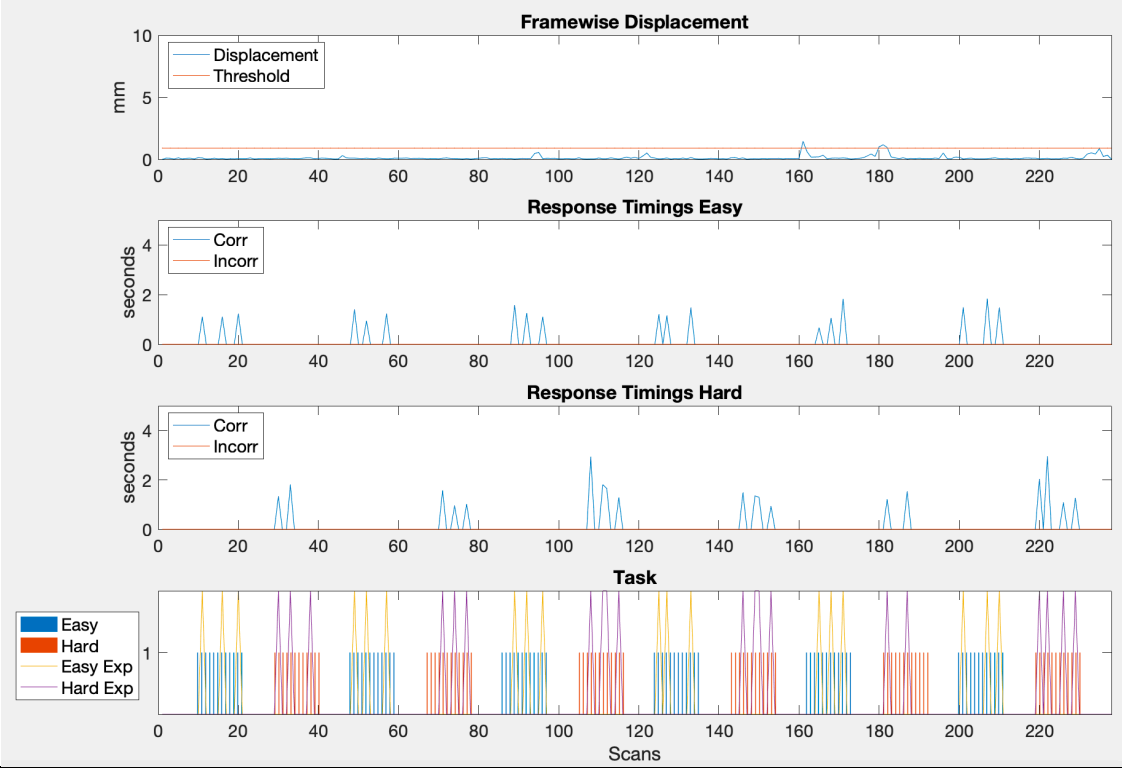

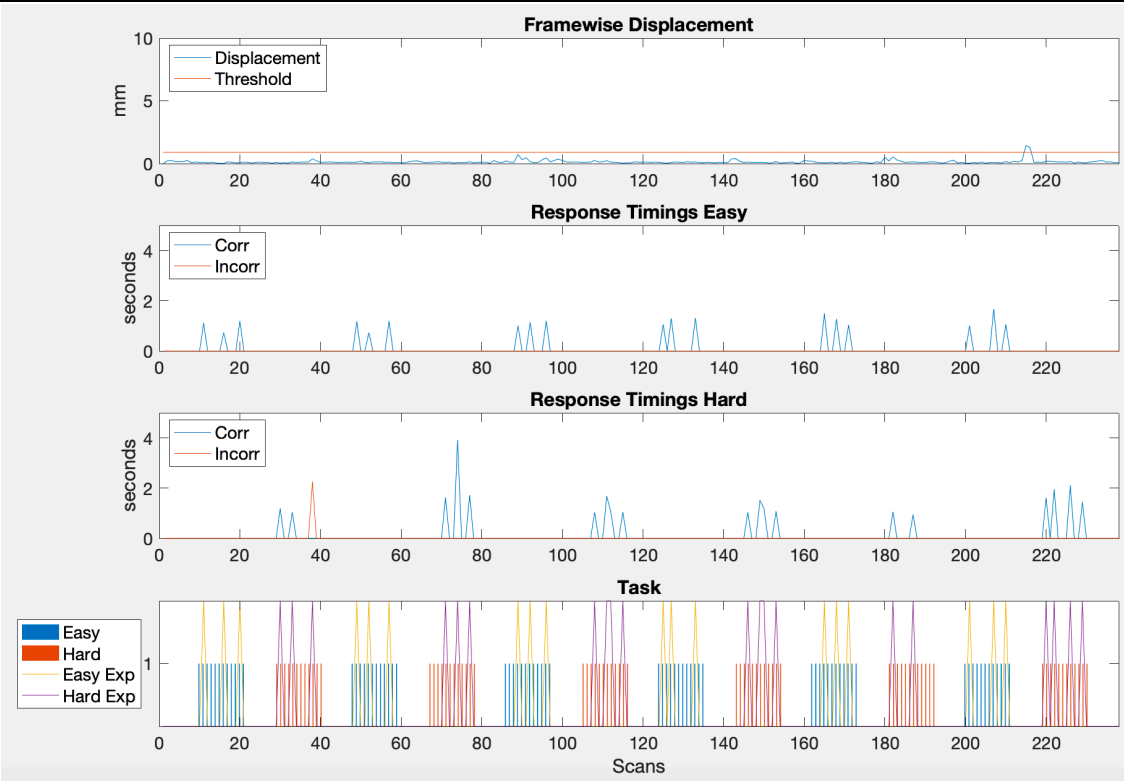



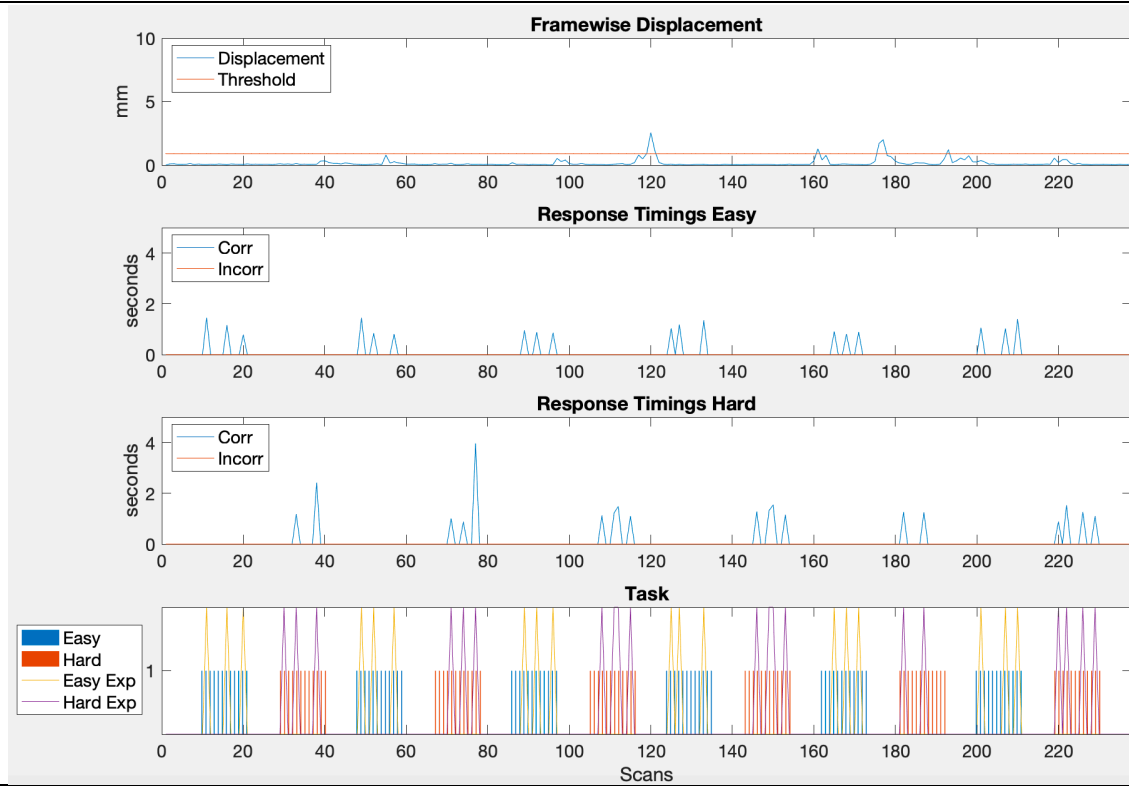

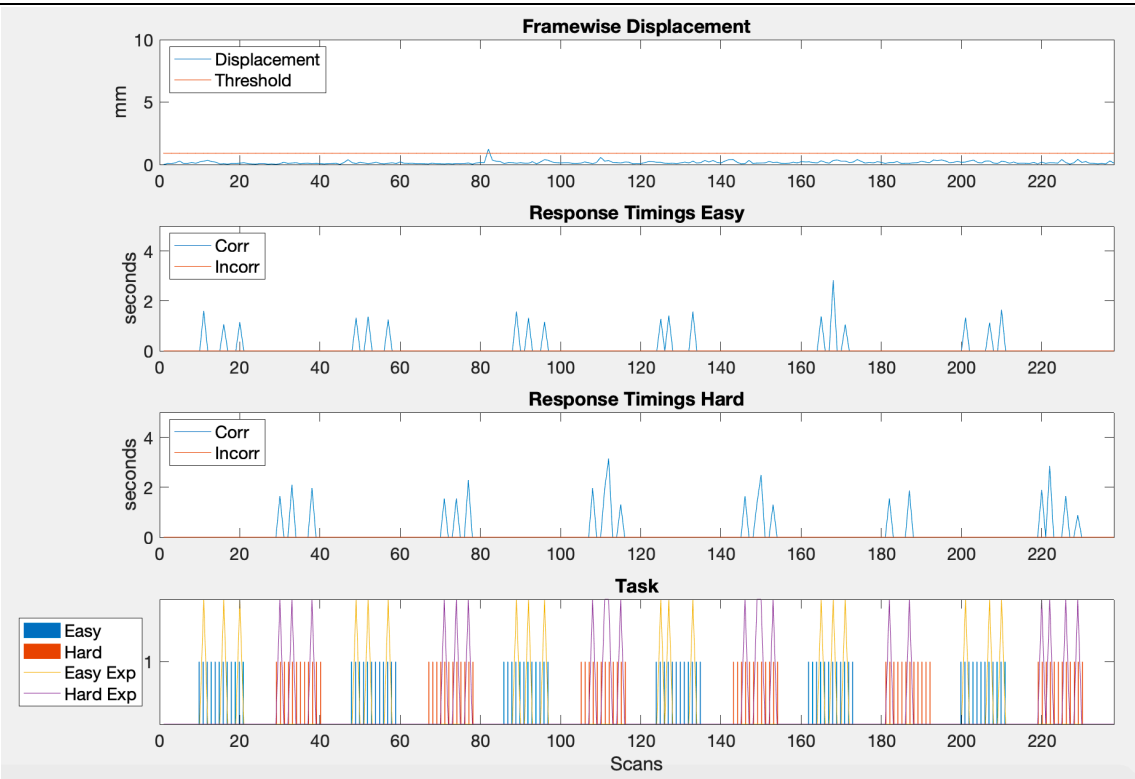

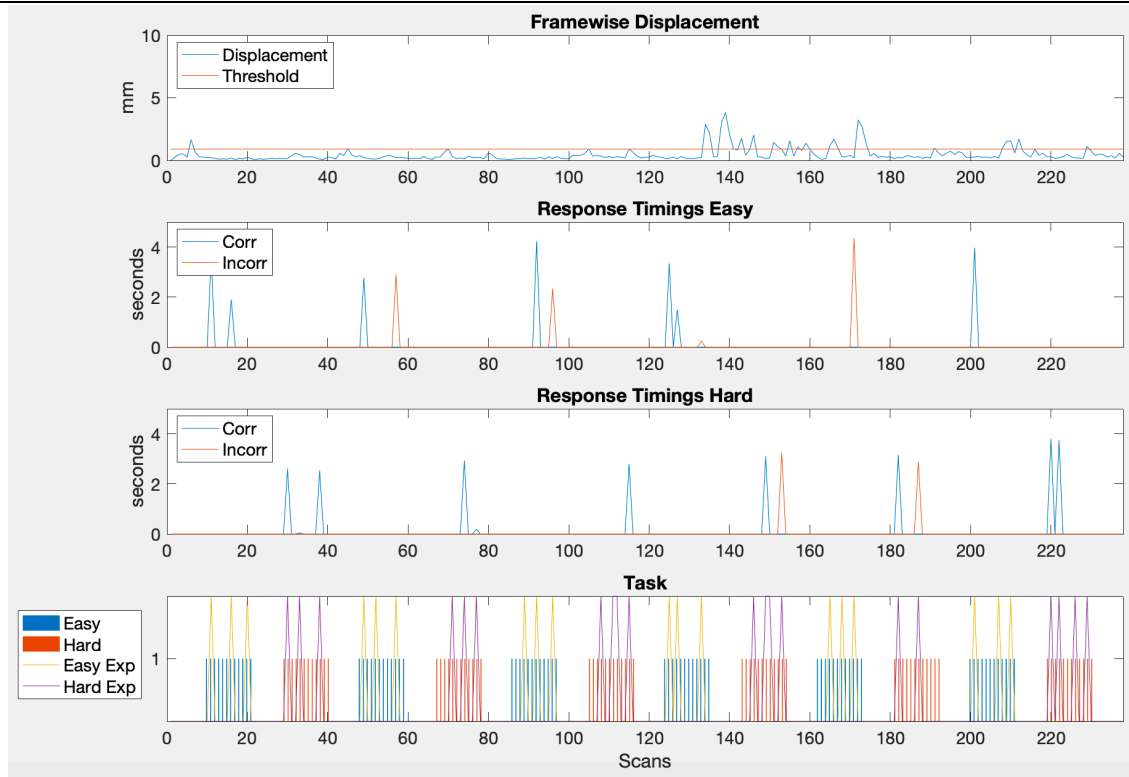

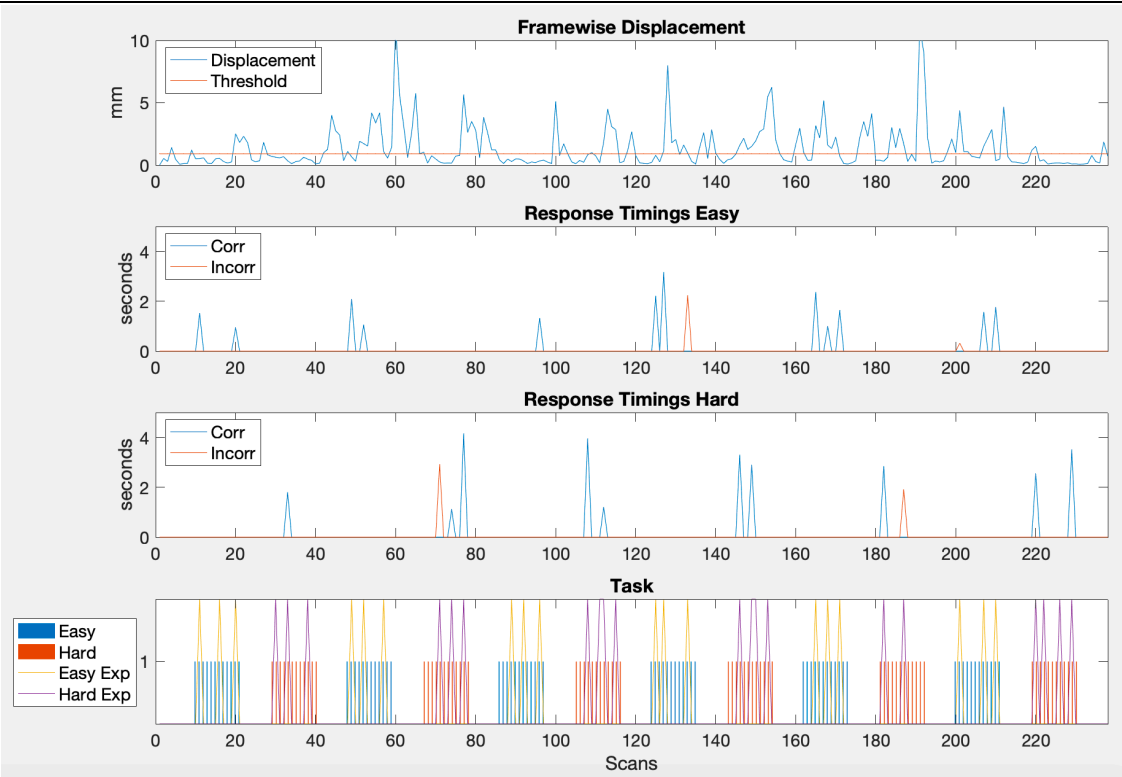

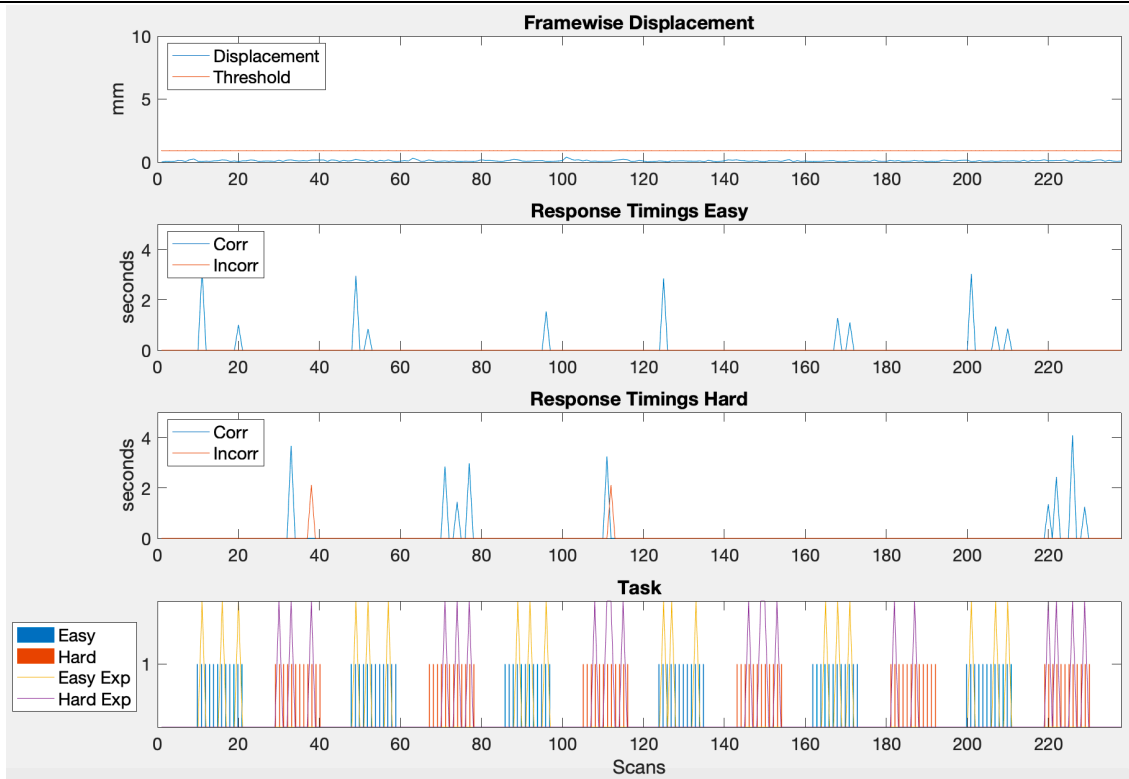

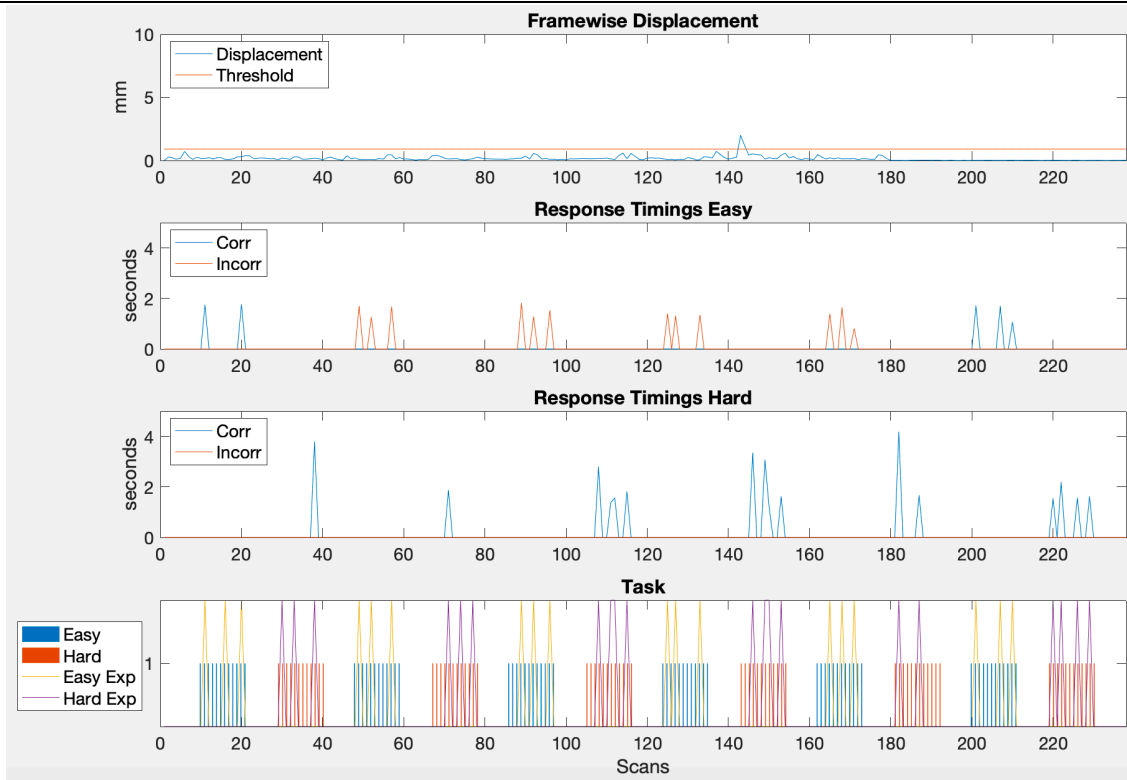

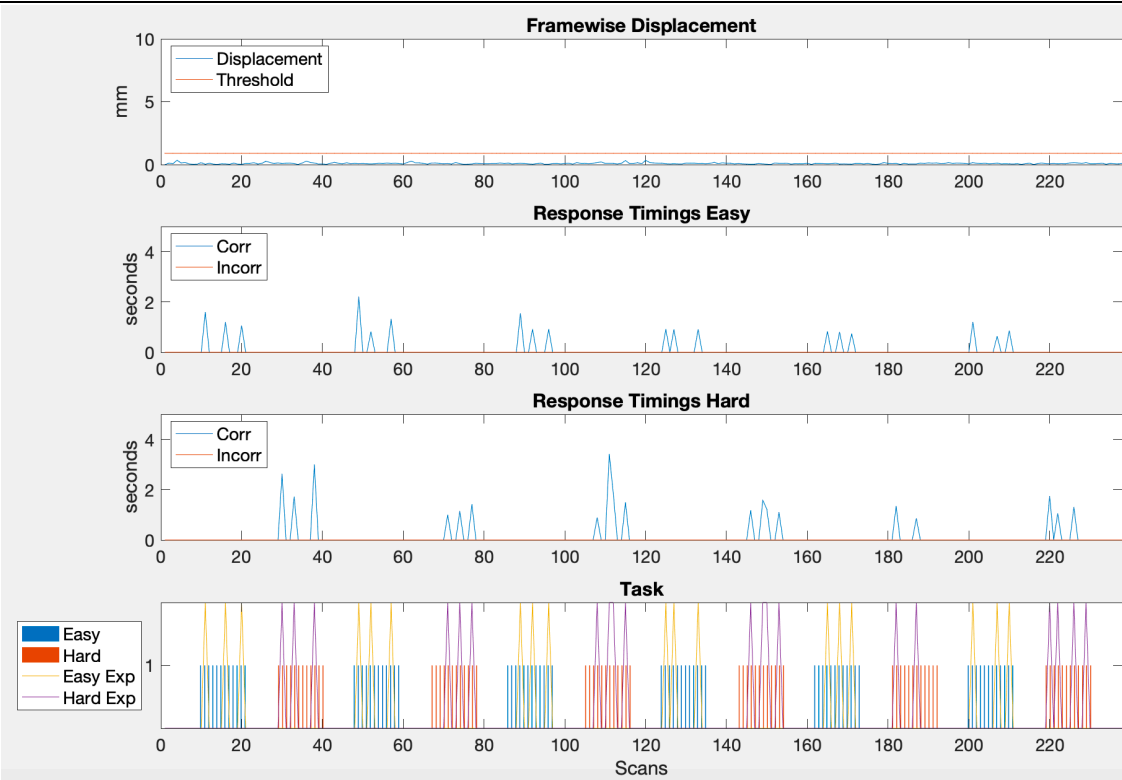

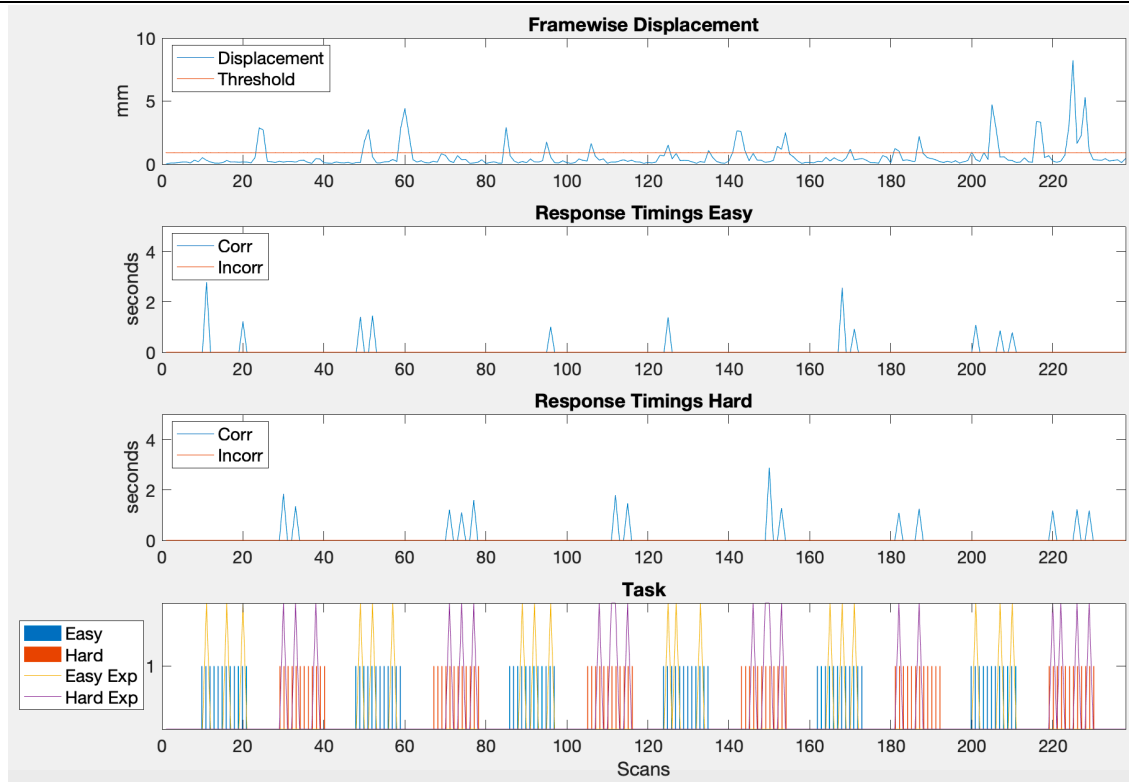



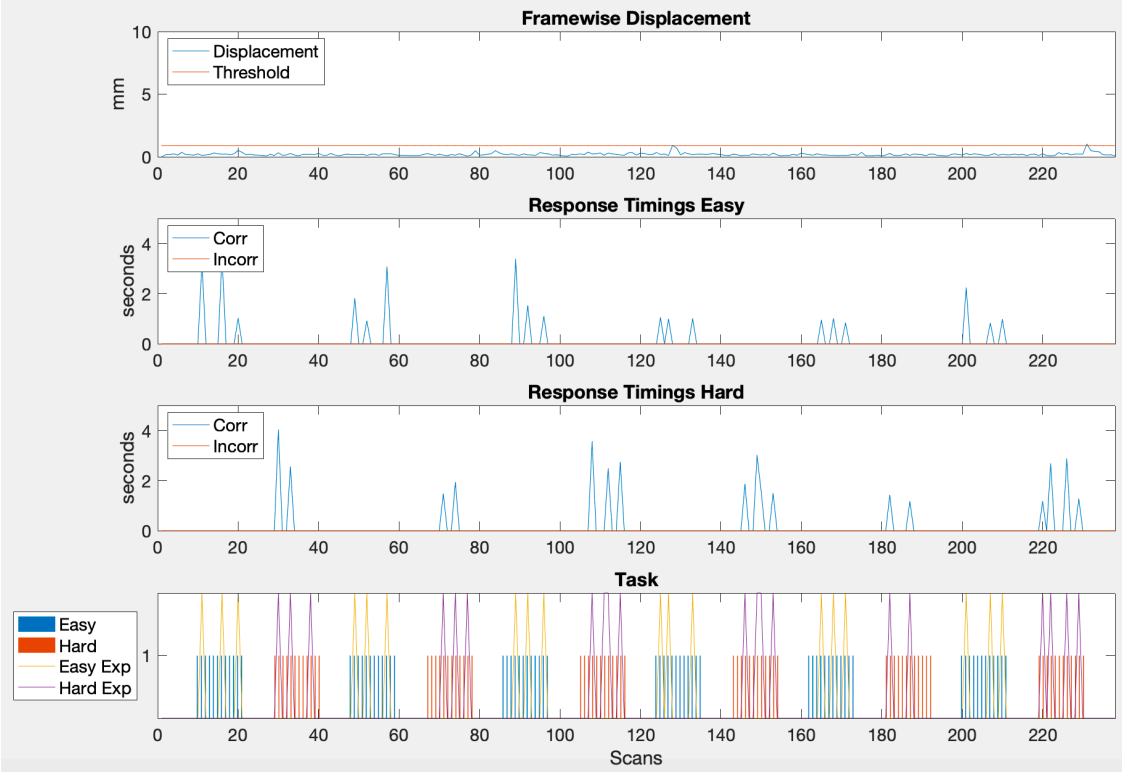

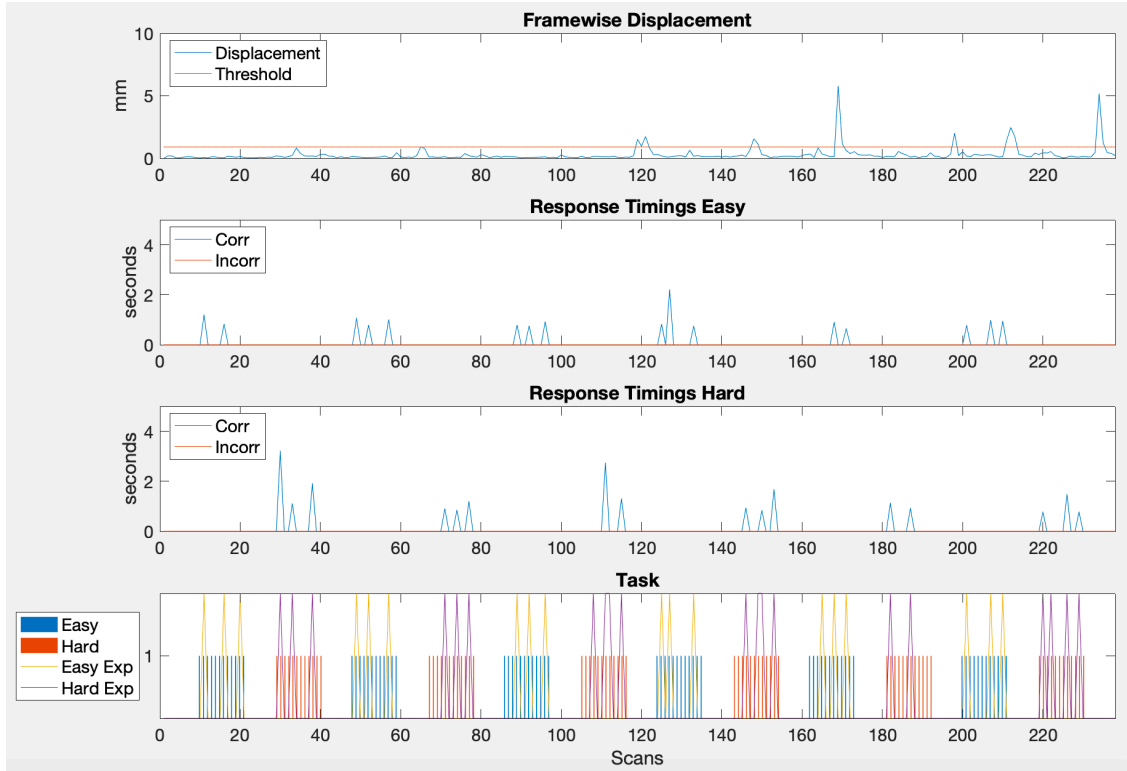

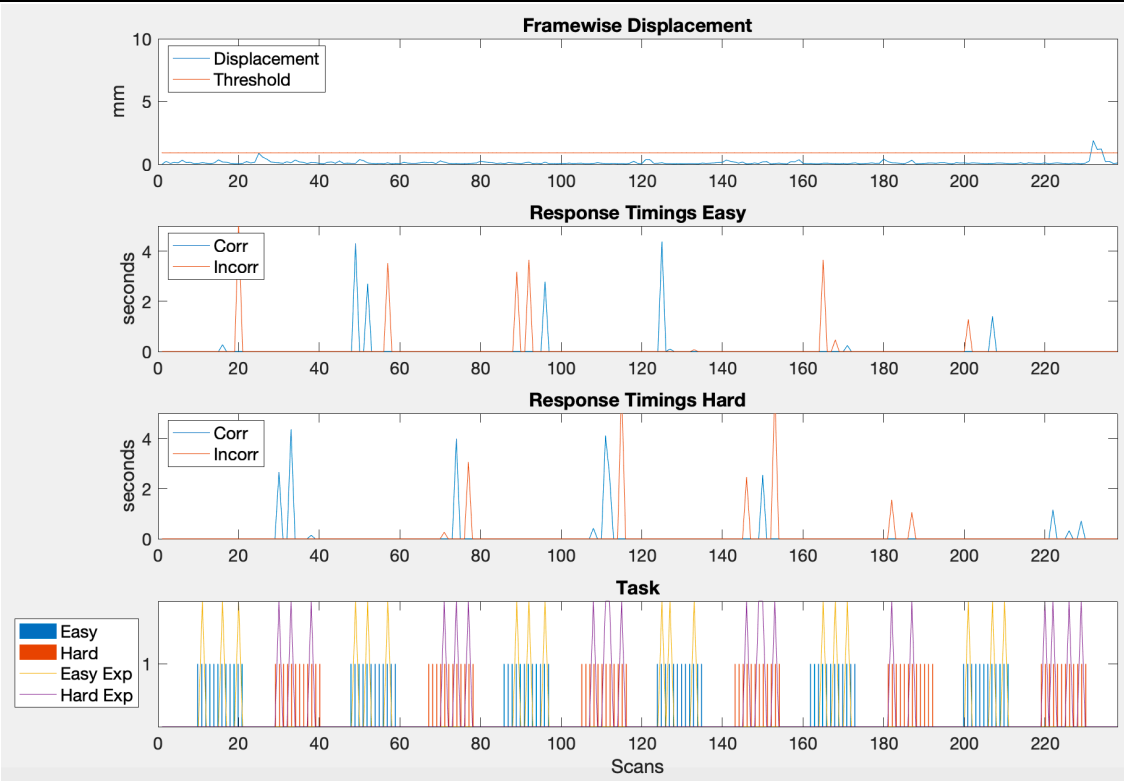

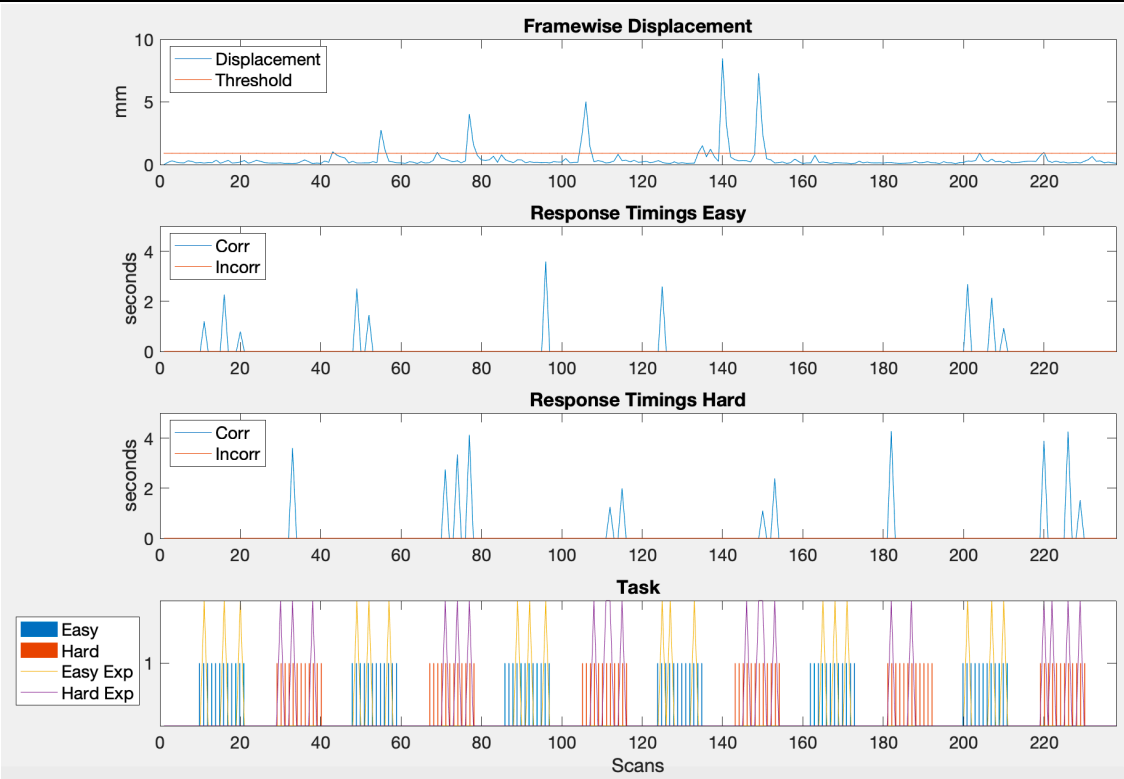

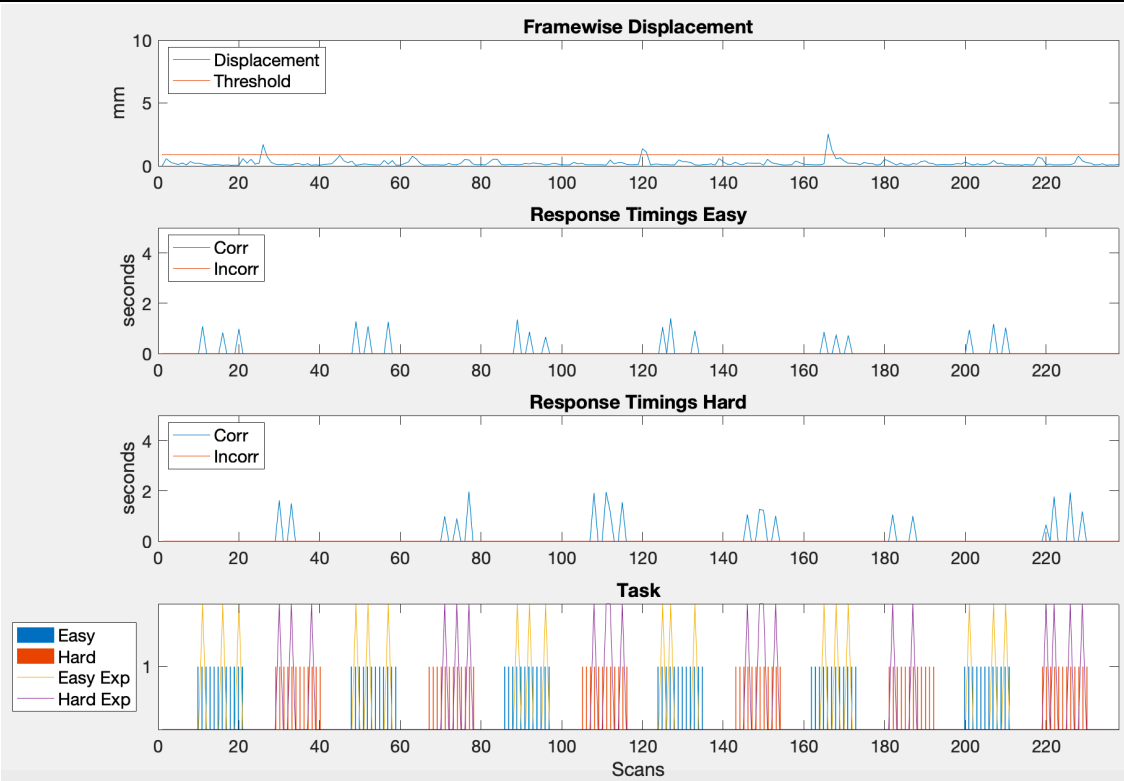

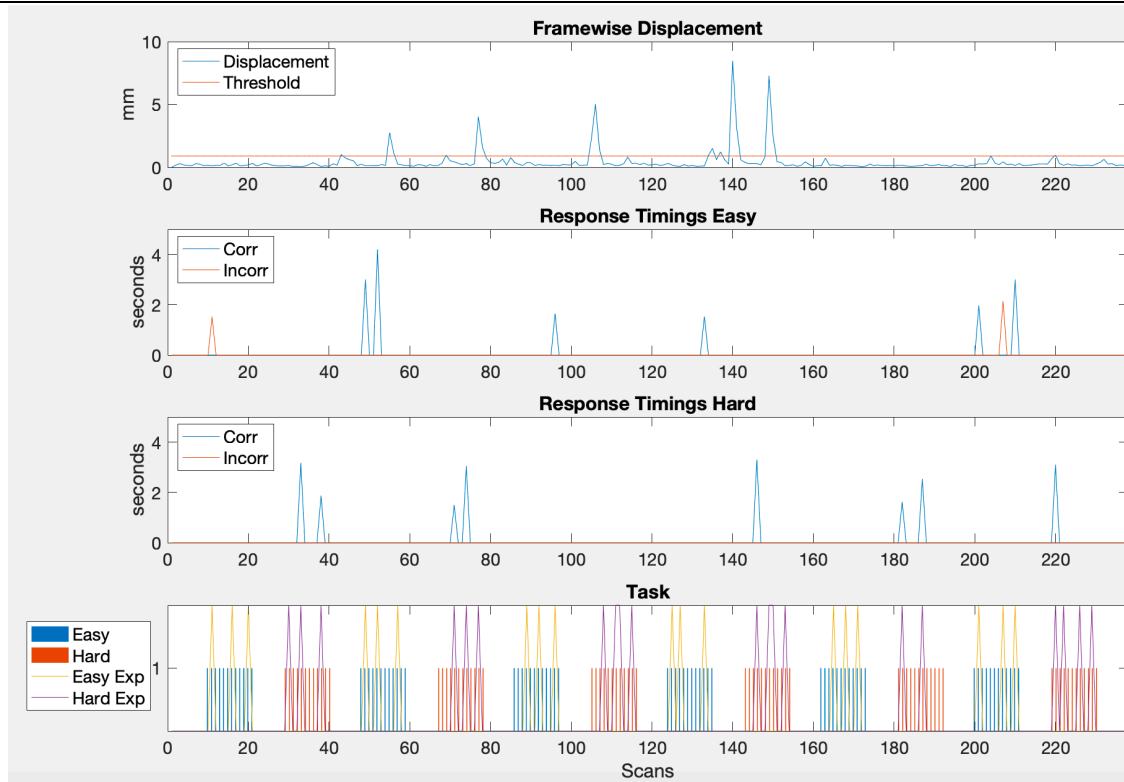

**Table S4:** List of activations from a group analysis using FSL. Easy and hard levels for controls and EPT subjects are reported for early stopping and full scan durations. Thresholds of  $p < 0.001$  uncorrected and minimum cluster extent = 10 voxels have been applied.

| Group                  | Cluster No. | Coordinates (MNI) | No. of Voxels | Peak z-score | Side  | Location                |
|------------------------|-------------|-------------------|---------------|--------------|-------|-------------------------|
| <b>2-Block</b>         |             |                   |               |              |       |                         |
| <b>Early stopping:</b> |             |                   |               |              |       |                         |
| <b>Easy</b>            |             |                   |               |              |       |                         |
| EPT                    | 1           | 32 -60 40         | 283           | 7.62         | Right | Precuneus               |
|                        | 2           | -6 8 48           | 274           | 6.32         | Left  | Cingulate Gyrus         |
|                        | 3           | -40 16 0          | 30            | 3.67         | Left  | Insula                  |
|                        | 4           | -54 10 0          | 28            | 6.87         | Left  | Superior Temporal Gyrus |
|                        | 5           | -50 4 38          | 15            | 4.37         | Left  | Precentral Gyrus        |
|                        | 6           | -42 8 30          | 14            | 4.89         | Left  | Inferior Frontal Gyrus  |

|                     |    |            |      |      |       |                          |
|---------------------|----|------------|------|------|-------|--------------------------|
|                     | 7  | -42 -6 40  | 13   | 4.55 | Left  | Precentral Gyrus         |
|                     | 8  | -28 -60 42 | 13   | 6.15 | Left  | Precuneus                |
|                     | 9  | 36 16 4    | 11   | 3.87 | Right | Clastrum                 |
|                     | 10 | 6 -28 10   | 10   | 3.94 | Right | Thalamus                 |
| <b>Control</b>      | 1  | -46 2 28   | 652  | 7.07 | Left  | Precentral Gyrus         |
|                     | 2  | 42 -44 46  | 498  | 8.88 | Right | Inferior Parietal Lobule |
|                     | 3  | -12 16 32  | 292  | 6.44 | Left  | Cingulate Gyrus          |
|                     | 4  | -48 -40 40 | 231  | 6.13 | Left  | Supramarginal Gyrus      |
|                     | 5  | -8 0 50    | 124  | 5.38 | Left  | Cingulate Gyrus          |
|                     | 6  | 20 -32 18  | 96   | 3.84 | Right | Caudate                  |
|                     | 7  | -38 14 -2  | 28   | 3.94 | Left  | Clastrum                 |
|                     | 8  | 40 18 -2   | 12   | 3.39 | Right | Insula                   |
|                     | 9  | 50 -28 36  | 11   | 3.44 | Right | Inferior Parietal Lobule |
|                     | 10 | 36 -56 64  | 10   | 5.2  | Right | Superior Parietal Lobule |
| <b>Hard<br/>EPT</b> | 1  | 8 22 34    | 94   | 8.43 | Right | Cingulate Gyrus          |
|                     | 2  | -8 8 50    | 56   | 6.79 | Left  | Medial Frontal Gyrus     |
|                     | 3  | -20 10 30  | 38   | 4.08 | Left  | Cingulate Gyrus          |
|                     | 4  | 40 -40 46  | 33   | 7.87 | Right | Inferior Parietal Lobule |
|                     | 5  | -12 16 34  | 31   | 6.24 | Left  | Cingulate Gyrus          |
|                     | 6  | -34 16 28  | 31   | 5.05 | Left  | Inferior Frontal Gyrus   |
|                     | 7  | 18 12 62   | 31   | 4.9  | Right | Medial Frontal Gyrus     |
|                     | 8  | -40 0 30   | 29   | 6.9  | Left  | Precentral Gyrus         |
|                     | 9  | -36 -4 58  | 19   | 5.52 | Left  | Precentral Gyrus         |
|                     | 10 | -38 -44 62 | 15   | 4.51 | Left  | Inferior Parietal Lobule |
|                     | 11 | 32 -46 64  | 10   | 5.06 | Right | Superior Parietal Lobule |
|                     | 12 | 2 16 56    | 10   | 4.82 | Left  | Superior Frontal Gyrus   |
| <b>Control</b>      | 1  | -8 20 30   | 1058 | 7.92 | Left  | Cingulate Gyrus          |
|                     | 2  | -46 4 30   | 420  | 10.3 | Left  | Precentral Gyrus         |
|                     | 3  | -48 -38 42 | 384  | 5.92 | Left  | Supramarginal Gyrus      |
|                     | 4  | 40 -44 44  | 287  | 8.94 | Right | Inferior Parietal Lobule |
|                     | 5  | -56 22 28  | 177  | 6.9  | Left  | Middle Frontal Gyrus     |

|    |             |    |      |       |                          |
|----|-------------|----|------|-------|--------------------------|
| 6  | 12 -12 28   | 91 | 4.57 | Right | Cingulate Gyrus          |
| 7  | -18 6 66    | 53 | 5.21 | Left  | Middle Frontal Gyrus     |
| 8  | -46 -68 -12 | 47 | 4.02 | Left  | Fusiform Gyrus           |
| 9  | -8 -12 26   | 22 | 3.53 | Left  | Cingulate Gyrus          |
| 10 | -40 -52 62  | 21 | 5.43 | Left  | Superior Parietal Lobule |
| 11 | 46 -64 -10  | 18 | 3.76 | Right | Fusiform Gyrus           |
| 12 | 44 -76 -10  | 15 | 3.71 | Right | Fusiform Gyrus           |
| 13 | 16 6 64     | 14 | 4.58 | Right | Superior Frontal Gyrus   |

#### 4-Block

##### Early stopping:

##### Easy

|            |   |            |     |      |       |                         |
|------------|---|------------|-----|------|-------|-------------------------|
| <b>EPT</b> | 1 | -6 8 46    | 379 | 7.25 | Left  | Cingulate Gyrus         |
|            | 2 | 32 -60 40  | 251 | 8.73 | Right | Precuneus               |
|            | 3 | -42 10 30  | 51  | 5.95 | Left  | Inferior Frontal Gyrus  |
|            | 4 | -28 -60 42 | 22  | 7.67 | Left  | Precuneus               |
|            | 5 | 36 18 46   | 21  | 3.83 | Right | Middle Frontal Gyrus    |
|            | 6 | -52 10 2   | 14  | 5.13 | Left  | Superior Temporal Gyrus |
|            | 7 | -42 -4 40  | 11  | 4.93 | Left  | Precentral Gyrus        |
|            | 8 | -34 16 4   | 11  | 4.2  | Left  | Insula                  |
|            | 9 | 38 18 2    | 11  | 3.49 | Right | Insula                  |

|                |   |            |     |      |       |                          |
|----------------|---|------------|-----|------|-------|--------------------------|
| <b>Control</b> | 1 | -48 2 26   | 700 | 8.09 | Left  | Inferior Frontal Gyrus   |
|                | 2 | 42 -44 46  | 680 | 9.41 | Right | Inferior Parietal Lobule |
|                | 3 | -8 2 52    | 675 | 5.66 | Left  | Cingulate Gyrus          |
|                | 4 | -48 -40 40 | 285 | 7.01 | Left  | Supramarginal Gyrus      |
|                | 5 | 20 -32 18  | 181 | 4.53 | Right | Caudate                  |
|                | 6 | -18 -6 26  | 181 | 4.23 | Left  | Caudate                  |
|                | 7 | 52 -32 42  | 15  | 3.92 | Right | Inferior Parietal Lobule |
|                | 8 | -38 14 -2  | 14  | 3.9  | Left  | Clastrum                 |
|                | 9 | 18 -10 24  | 12  | 3.73 | Right | Caudate                  |

##### Hard

|            |   |           |     |      |       |                      |
|------------|---|-----------|-----|------|-------|----------------------|
| <b>EPT</b> | 1 | 36 -42 48 | 342 | 4.99 | Right | Precuneus            |
|            | 2 | -10 -2 52 | 301 | 4.63 | Left  | Medial Frontal Gyrus |



|   |            |     |      |       |                      |
|---|------------|-----|------|-------|----------------------|
| 3 | -14 14 34  | 167 | 6.15 | Left  | Cingulate Gyrus      |
| 4 | -44 0 38   | 60  | 5.28 | Left  | Precentral Gyrus     |
| 5 | -36 -4 58  | 32  | 3.89 | Left  | Precentral Gyrus     |
| 6 | 12 20 28   | 17  | 5.21 | Right | Cingulate Gyrus      |
| 7 | -30 -58 42 | 15  | 4.02 | Left  | Angular Gyrus        |
| 8 | -32 16 34  | 14  | 3.85 | Left  | Middle Frontal Gyrus |

|                |    |            |     |      |       |                          |
|----------------|----|------------|-----|------|-------|--------------------------|
| <b>Control</b> | 1  | -6 20 32   | 731 | 8.54 | Left  | Cingulate Gyrus          |
|                | 2  | 40 -44 44  | 364 | 9.74 | Right | Inferior Parietal Lobule |
|                | 3  | -44 12 24  | 335 | 7.29 | Left  | Inferior Frontal Gyrus   |
|                | 4  | -48 -38 42 | 227 | 6.54 | Left  | Supramarginal Gyrus      |
|                | 5  | -14 -6 22  | 75  | 4.14 | Left  | Caudate                  |
|                | 6  | -44 34 30  | 46  | 4.05 | Left  | Middle Frontal Gyrus     |
|                | 7  | -46 20 20  | 45  | 5.13 | Left  | Middle Frontal Gyrus     |
|                | 8  | -16 -24 22 | 29  | 4.21 | Left  | Caudate                  |
|                | 9  | 40 10 26   | 24  | 4.22 | Right | Precentral Gyrus         |
|                | 10 | 8 8 24     | 17  | 3.92 | Right | Cingulate Gyrus          |
|                | 11 | -42 -46 62 | 17  | 5.5  | Left  | Inferior Parietal Lobule |
|                | 12 | 10 -12 28  | 15  | 4.43 | Right | Cingulate Gyrus          |
|                | 13 | 16 -22 22  | 13  | 3.79 | Right | Caudate                  |
|                | 14 | 20 -10 26  | 13  | 3.44 | Right | Caudate                  |
|                | 15 | -36 28 22  | 10  | 4.25 | Left  | Middle Frontal Gyrus     |

**Full duration:**

**Easy**

|            |   |            |     |      |       |                          |
|------------|---|------------|-----|------|-------|--------------------------|
| <b>EPT</b> | 1 | 28 -56 50  | 150 | 4.93 | Right | Superior Parietal Lobule |
|            | 2 | -10 8 44   | 144 | 4.49 | Left  | Cingulate Gyrus          |
|            | 3 | -40 12 32  | 44  | 4.81 | Left  | Precentral Gyrus         |
|            | 4 | 52 20 38   | 28  | 5.48 | Right | Middle Frontal Gyrus     |
|            | 5 | 32 18 44   | 28  | 4.54 | Right | Middle Frontal Gyrus     |
|            | 6 | -30 -60 44 | 17  | 4.30 | Left  | Angular Gyrus            |
|            | 7 | 8 30 38    | 14  | 4.16 | Right | Cingulate Gyrus          |
|            | 8 | 46 14 28   | 13  | 5.75 | Right | Precentral Gyrus         |

|                 |    |            |     |      |       |                          |
|-----------------|----|------------|-----|------|-------|--------------------------|
| <b>Control</b>  | 1  | -46 0 26   | 754 | 6.52 | Left  | Inferior Frontal Gyrus   |
|                 | 2  | 40 -44 46  | 612 | 9.21 | Right | Inferior Parietal Lobule |
|                 | 3  | -12 14 36  | 573 | 6.05 | Left  | Cingulate Gyrus          |
|                 | 4  | -36 -46 44 | 225 | 9.53 | Left  | Inferior Parietal Lobule |
|                 | 5  | 20 -30 18  | 65  | 5.06 | Right | Caudate                  |
|                 | 6  | -40 18 -2  | 17  | 3.62 | Left  | Insula                   |
| <b>Hard EPT</b> | 1  | -14 14 34  | 446 | 6.78 | Left  | Cingulate Gyrus          |
|                 | 2  | 36 -42 48  | 418 | 5.93 | Right | Precuneus                |
|                 | 3  | -44 2 38   | 66  | 5.09 | Left  | Precentral Gyrus         |
|                 | 4  | -30 -58 42 | 40  | 4.31 | Left  | Angular Gyrus            |
|                 | 5  | -50 22 24  | 15  | 3.65 | Left  | Inferior Frontal Gyrus   |
|                 | 6  | -32 16 34  | 15  | 3.98 | Left  | Middle Frontal Gyrus     |
|                 | 7  | 8 0 68     | 14  | 4.2  | Right | Medial Frontal Gyrus     |
|                 | 8  | 12 4 28    | 11  | 4.26 | Right | Cingulate Gyrus          |
|                 | 9  | -10 -4 66  | 11  | 3.68 | Left  | Medial Frontal Gyrus     |
|                 | 10 | 40 10 26   | 10  | 4.25 | Right | Precentral Gyrus         |
| <b>Control</b>  | 1  | -10 14 36  | 680 | 7.70 | Left  | Cingulate Gyrus          |
|                 | 2  | 38 -44 44  | 590 | 9.12 | Right | Inferior Parietal Lobule |
|                 | 3  | -34 -46 44 | 277 | 9.47 | Left  | Inferior Parietal Lobule |
|                 | 4  | -44 0 28   | 259 | 5.16 | Left  | Precentral Gyrus         |
|                 | 5  | -46 22 22  | 128 | 5.00 | Left  | Middle Frontal Gyrus     |
|                 | 6  | -16 -24 22 | 68  | 4.02 | Left  | Caudate                  |
|                 | 7  | 20 -32 18  | 63  | 3.94 | Right | Caudate                  |
|                 | 8  | -40 16 -6  | 45  | 5.62 | Left  | Insula                   |
|                 | 9  | -22 6 66   | 12  | 3.43 | Left  | Superior Frontal Gyrus   |
|                 | 10 | 0 -86 6    | 11  | 3.69 | Left  | Lingual Gyrus            |

---
